# Supplementary material for: Multiple Geographical Origins of Environmental Sex Determination enhanced the diversification of Darwin’s Favourite Orchids
Source: PubMed Central journal article supplement (PMC5635016; doi:10.1038/s41598-017-12300-y), 2017-10-10

**Multiple Geographical Origins of Environmental Sex Determination enhanced the diversification of Darwin's Favourite Orchids**

Oscar Alejandro Pérez-Escobar<sup>1\*</sup>; Guillaume Chomicki<sup>2</sup>; Fabien L. Condamine<sup>3</sup>; Jurriaan M. de Vos<sup>4\*</sup>; Aline C. Martins<sup>5</sup>; Eric C. Smidt<sup>5</sup>; Bente Klitgård<sup>1</sup>; Günter Gerlach<sup>6</sup>; Jochen Heinrichs<sup>2</sup>

**Appendix S1:**

**Including:** Extended Materials and Methods.

**Including:** Supplementary tables (S1-S7) and figures (S1-S14).

## **Extended Materials and Methods**

### *Phylogenetic incongruence analysis*

PACo is a co-phylogenetic approach that is capable of assessing similarities between two trees by comparison of Euclidean distance matrices derived from phylogenies. Additionally, it determines the contribution of every association (i.e. pair of terminals of the analysed phylogenies) to the co-phylogenetic pattern observed, thus it has the potential to statistically identify specific potential conflicting terminals. PACo requires as input data a set of phylograms (e.g., posterior distribution of trees, or bootstrap replicate trees) derived from every genomic compartment (i.e. nucleus and plastids) and a binary association matrix, in which same taxa present in both datasets are linked. We executed PACo using 1000 trees from the Bayesian posterior distribution of trees obtained from MrBayes analysis computed from concatenated nuclear and plastid datasets, respectively. Plastids are maternally inherited in orchids<sup>1,2</sup>, hence they reflect maternal evolutionary relationships between species. Contrastingly, nuclear loci show bi-parental inheritance<sup>3</sup>, thus revealing maternal and paternal evolutionary histories – potentially revealing a more comprehensive perspective on the evolutionary relations between species. Therefore, conflicting plastid sequences were excluded from the dataset, and non-conflicting sequences of each locus were re-aligned and concatenated.

### *Ancestral area estimation (AAE)*

We relied on BIOGEOBEARS (Biogeography with Bayesian and Likelihood Evolutionary Analysis in R script) to carry AAE analyses. Unlike previous programs such as LAGRANGE<sup>4</sup>, ‘BIOGEOBEARS’ evaluates several biogeographical models altogether testing the role and contribution of evolutionary processes (i.e., range expansions, local extinctions, founder-event speciation, vicariance, and speciation in

the same biogeographic region) that were taken into account to explain extant, observed distributions in a joint statistical framework. Thus, it enables model testing, because distinct geographical and phylogenetic datasets can have biogeographic histories best modelled by different approaches<sup>5</sup>. We divided the geographical range of Catasetinae and outgroup taxa in eight biogeographic regions (1) Central America, comprising southern Mexico through Panama and the Antilles; (2) Guiana Shield, encompasses areas above 500 m in Colombia, Venezuela, Brazil, Guyana, Suriname and French Guiana; (3) Amazonia, encompassing lowlands and pre-montane forest below 800 m in Colombia, Ecuador, Peru, Brazil, Venezuela, Guyana, Suriname, and French Guiana<sup>6</sup>; (4) Chocó, comprising lowlands below 500 m of the western Andes in Colombia and Ecuador; (5) Northern Andes, includes elevated areas above 800 m from Southernmost Peru to Northern Colombia and Northeast Venezuela; (6) Central Andes (comprising areas above 800 m in Northern Peru to Northern Chile and Northeast Argentina); (7) South-eastern South America (encompassing part of the Brazilian shield, South-eastern Bolivia, Paraguay, Uruguay, and Northern Argentina); and (8) Africa and Australasia (representing distribution ranges of outgroup taxa).

### *Molecular clock dating*

We selected the crown group of Catasetinae and the tree root (i.e., MRCA of Vandae +Cymbidiidae), respectively. We set the tree root (i.e., MRCA of Vandae +Cymbidiidae) to  $34.05 \pm 8$  Myrs and the crown group of Catasetinae to  $19.88 \pm 6$  Myrs, using a normal distribution. For strict molecular clock calibration, we placed a single constraint only at the tree root ( $34.05 \pm 8$  Myrs), using a normal distribution.

For each clock model, we ran two MCMC analyses with 20 million generations each, sampled every 1000<sup>th</sup> generation. For the relaxed molecular clock

analyses, we estimated the coefficient of variation (CV) to inform us on the rate heterogeneity among branches (CV approaching 0 indicates that the among-branch variation in substitution rate is much smaller magnitude than the mean rate, hence, a strict clock model cannot be rejected). Parameter convergence was confirmed using TRACER 1.6 (<http://tree.bio.ed.ac.uk/software/tracer/>). All dating analyses were performed at the CIPRES Science Gateway computing facility<sup>7</sup>.

### *Trait-dependent diversification analyses*

We relied on the Binary State Speciation and Extinction (BiSSE) model<sup>8</sup> to estimate diversification rates associated with all three traits (i.e., ESD, epiphytism, and euglossine-bee pollination). BiSSE model built upon the premise that speciation and extinction rates depend on the state of a particular character. We tested eight models with different configurations of speciation, extinction, and transition rates between characters: (i) equal rates model (no effect of the trait on diversification,  $M_1$ ); (ii) free speciation rates in lineages with and without a trait, and equal rates of extinction and transition ( $M_2$ ); (iii) free extinction rates in lineages with and without a trait, and equal rates of speciation and transition ( $M_3$ ); (iv) free transition rates in lineages with and without a trait, and equal rates of speciation and extinction ( $M_4$ ); (v) free speciation and extinction rates in lineages with and without a trait, and equal rates of transition ( $M_5$ ); (vi) free speciation and transition rates in lineages with and without a trait, and equal rates of extinction ( $M_6$ ); (vii) free extinction and transition rates in lineages with and without a trait, and equal rates of speciation ( $M_7$ ); and (viii) all parameters are free ( $M_8$ ).

We estimated the speciation, extinction, and transition rates corresponding to the best fitting model, according to the AICc criterion. We ran Bayesian MCMC analyses on the consensus tree, using exponential priors with parameters obtained from the best fitting model, a 1000-step burn-in, and 10,000-step chain<sup>8</sup>. Convergence occurred within the few first steps and parameter estimates were very stable along the chain. We summarised the posterior distributions of samples to assess variation in net diversification, turnover, and transition rates across character states after the burn-in phase. We used a global sampling of 139 species (~32% of the extant diversity of Catasetinae + Cyrtopodiinae), and we accounted for missing taxa by accommodating sampling fractions for every trait as follows: (i) ESD: 41% of the know species with ESD sampled vs. 44% of the know species with alternative matting systems sampled; (ii) euglossine-bee pollination: 31% of the know species with this trait sampled vs. 33% of the know species with alternative pollination syndromes trait sampled; (iii) epiphytism: 40% of the know epiphyte species sampled vs. 45% of the known species with alternative plant habits sampled. Information on occurrence of epiphytism and euglossine-bee pollination syndrome was obtained from the literature<sup>9,10</sup>. We took phylogenetic and dating uncertainties into account by running these models over a series of 500 dated trees randomly selected from the BEAST dating analysis. We then selected the best-fitting model based on the corrected Akaike Informative Criterion (AICc).

Because BiSSE may be subject to Type I errors biases<sup>11</sup>, we tested whether diversification rates associated to character states are not artefacts. To do so, we reshuffled the coding states onto the phylogeny and ran the BiSSE models. We executed 10,000 iterations, estimating the AIC of the best model at each iteration to

get the null distribution of AIC (associated with random states) and compared it with the AIC value obtained with the observed dataset.

## References

1. Chang, S.-B., Chen, W.-H., Chen, H.-H., Fu, Y.-M. & Lin, Y.-S. RFLP and inheritance patterns of chloroplast DNA in intergenic hybrids of *Phalaenopsis* and *Doritis*. *Bot. Stud.* **41**, 219–223 (2000).
2. Cafasso, D., Widmer, A. & Cozzolino, S. Chloroplast DNA inheritance in the orchid *Anacamptis palustris* using single-seed polymerase chain reaction. *J. Hered.* **96**, 66–70 (2005).
3. Petit, R. J. *et al.* Comparative organization of chloroplast , mitochondrial and nuclear diversity in plant populations. *Mol. Ecol.* **14**, 689–701 (2005).
4. Ree, R. H. & Smith, S. A. Maximum Likelihood inference of geographic range evolution by dispersal, local extinction, and cladogenesis. *Syst. Biol.* **57**, 4–14 (2008).
5. Matzke, N. J. Model selection in historical biogeography reveals that founder-event speciation is a crucial process in island clades. *Syst. Biol.* **63**, 951–970 (2014).
6. Antonelli, A., Nylander, J. A. A., Persson, C. & Sanmartín, I. Tracing the impact of the Andean uplift on Neotropical plant evolution. *Proc. Natl. Acad. Sci. U. S. A.* **106**, 9749–9754 (2009).
7. Miller, M. A. *et al.* A RESTful API for access to phylogenetic tools via the CIPRES Science Gateway. *Evol. Bioinforma.* **11**, 43–48 (2015).
8. FitzJohn, R. G. Analysing diversification with diversitree. 1–34 (2010).
9. Pridgeon, A. M., Cribb, P. J., Chase, M. W. & Rasmussen, F. N. *Genera*

- Orchidacearum: Vol. 5. Epidendroideae (part two)*. (Oxford University Press, 2009).
10. Ramirez, S. R. *et al.* Asynchronous diversification in a specialized plant-pollinator mutualism. *Science* (80-. ). **333**, 1742–1746 (2011).
  11. Maddison, W. P. & Fitzjohn, R. G. The unsolved challenge to phylogenetic correlation tests for categorical characters. *Syst. Biol.* **64**, 127–136 (2015).
  12. Baldwin, B. G. Phylogenetic utility of the internal transcribed spacers of nuclear ribosomal DNA in plants: An example from the compositae. *Mol. Phylogenet. Evol.* **1**, 3–16 (1992).
  13. Monteiro, S. H. N., Selbach-Schnadelbach, A., de Oliveira, R. P. & van den Berg, C. Molecular Phylogenetics of *Galeandra* (Orchidaceae: Catasetinae) based on Plastid and Nuclear DNA Sequences. *Syst. Bot.* **35**, 476–486 (2010).
  14. Baldwin, B. G. & Markos, S. Phylogenetic utility of the external transcribed spacer (ETS) of 18S-26S rDNA: congruence of ETS and ITS trees of *Calycadenia* (Compositae). *Mol. Phylogenet. Evol.* **10**, 449–63 (1998).
  15. Górnjak, M., Paun, O. & Chase, M. W. Phylogenetic relationships within Orchidaceae based on a low-copy nuclear coding gene, *Xdh*: Congruence with organellar and nuclear ribosomal DNA results. *Mol. Phylogenet. Evol.* **56**, 784–795 (2010).
  16. Neubig, K. M. *et al.* Phylogenetic utility of *ycf1* in orchids: a plastid gene more variable than *matK*. *Plant Syst. Evol.* **277**, 75–84 (2008).
  17. Hamilton, M. B. Primer Notes: Four primer pairs for the amplification of chloroplast intergenic regions with intraspecific variation. *Mol. Ecol.* **8**, 513–525 (1999).

## Supplementary tables

**Table S1.** Species names and voucher information for material use in this study. Taxa sequenced and newly produced sequences are shown in bold face.

| Species names                        | ITS             | ETS             | <i>Xdh</i>      | <i>matK</i> | <i>trnL-F</i> | <i>ycf1</i>     |
|--------------------------------------|-----------------|-----------------|-----------------|-------------|---------------|-----------------|
| <i>Acrolophia bolusii</i>            | KF318909        | -               | -               | KF358114    | -             | -               |
| <i>Acrolophia capensis</i>           | KF318958        | -               | -               | KF358074    | -             | -               |
| <i>Acrolophia cochlearis</i>         | KF318947        | -               | -               | KF358059    | -             | -               |
| <i>Acrolophia lamellata</i>          | KF318964        | -               | -               | KF358063    | -             | -               |
| <i>Acrolophia lunata</i>             | KF318965        | -               | -               | KF358129    | -             | -               |
| <i>Acrolophia micrantha</i>          | LN831482        | -               | -               | KF358111    | -             | -               |
| <i>Acrolophia ustulata</i>           | KF318963        | -               | -               | KF358121    | -             | -               |
| <i>Brassia aurantiaca</i>            | AF350518        | -               | -               | AF350597    | AF350676      | FJ563573        |
| <i>Capanemia superflua</i>           | AF350549        | -               | -               | FJ563840    | AF350707      | -               |
| <b><i>Catasetum barbatum</i></b>     | <b>MF987482</b> | <b>MF987475</b> | -               | -           | -             | -               |
| <i>Catasetum bertioguense</i>        | KU295252        | KU295217        | -               | -           | -             | -               |
| <b><i>Catasetum bicolor</i></b>      | <b>MF987483</b> | -               | <b>MF987494</b> | -           | -             | <b>MF987512</b> |
| <b><i>Catasetum blackii</i></b>      | <b>KU295253</b> | <b>KU295253</b> | -               | -           | -             | <b>KU350872</b> |
| <b><i>Catasetum boyi</i></b>         | <b>MF987484</b> | -               | <b>MF987495</b> | -           | -             | <b>MF987513</b> |
| <b><i>Catasetum callosum</i></b>     | <b>KU295254</b> | <b>MF987476</b> | <b>MF987496</b> | -           | -             | <b>KU350873</b> |
| <b><i>Catasetum cernuum</i></b>      | <b>KU295255</b> | <b>KU295219</b> | -               | -           | -             | <b>KU350874</b> |
| <b><i>Catasetum ciliatum</i></b>     | <b>KU295256</b> | <b>KU295219</b> | -               | -           | -             | <b>KU350875</b> |
| <i>Catasetum collare</i>             | KT768384        | KT768350        | KT768454        | -           | -             | KT768491        |
| <b><i>Catasetum complanatum</i></b>  | <b>KU295257</b> | <b>KU295221</b> | -               | -           | -             | <b>KU350876</b> |
| <b><i>Catasetum denticulatum</i></b> | <b>KU295258</b> | <b>KU295222</b> | <b>MF987497</b> | -           | -             | <b>KU350877</b> |
| <b><i>Catasetum discolor</i></b>     | <b>KU295259</b> | <b>KU295223</b> | <b>MF987498</b> | -           | -             | <b>MF987514</b> |
| <b><i>Catasetum expansum</i></b>     | <b>KU295260</b> | <b>KU295224</b> | <b>MF987499</b> | KF660300    | -             | <b>KU350878</b> |
| <b><i>Catasetum fimbriatum</i></b>   | <b>KU295261</b> | <b>KU295225</b> | <b>MF987500</b> | -           | -             | <b>KU350879</b> |



|                                 |          |          |          |   |          |          |
|---------------------------------|----------|----------|----------|---|----------|----------|
| <i>Catasetum galeritum</i>      | KU295262 | KU295226 | -        | - | -        | KU350880 |
| <i>Catasetum gladiatorium</i>   | KU295263 | KU295227 | -        | - | -        | KU350881 |
| <i>Catasetum globiflorum</i>    | -        | -        | -        | - | -        | MF987515 |
| <i>Catasetum gnomus</i>         | KU295264 | KU295228 | -        | - | -        | KU350882 |
| <i>Catasetum hopkinsonianum</i> | KU295265 | -        | -        | - | -        | -        |
| <i>Catasetum integerrimum</i>   | MF987485 | MF987477 | -        | - | -        | MF987516 |
| <i>Catasetum juruenense</i>     | KT768385 | KT768351 | KT768455 | - | -        | KT768492 |
| <i>Catasetum laminatum</i>      | LK054139 | -        | -        | - | -        | -        |
| <i>Catasetum lanciferum</i>     | KU295266 | KU295229 | MF987501 | - | -        | KU350884 |
| <i>Catasetum luridum</i>        | KU295267 | KU295230 | -        | - | -        | -        |
| <i>Catasetum macrocarpum</i>    | KT768386 | KT768352 | KT768456 | - | -        | KT768493 |
| <i>Catasetum maculatum</i>      | MF987486 | MF987478 | MF987502 | - | -        | -        |
| <i>Catasetum meeae</i>          | KT768387 | KT768353 | KT768457 | - | -        | -        |
| <i>Catasetum ochraceum</i>      | MF987487 | MF987479 | MF987503 | - | -        | MF987517 |
| <i>Catasetum ornithoides</i>    | MF987488 | -        | MF987504 | - | -        | MF987518 |
| <i>Catasetum osakadianum</i>    | KU295268 | KU295231 | -        | - | -        | KU350886 |
| <i>Catasetum osculatum</i>      | MF987489 | -        | MF987505 | - | -        | MF987519 |
| <i>Catasetum pileatum</i>       | KU295269 | -        | -        | - | -        | KU350887 |
| <i>Catasetum purum</i>          | KU295270 | KU295232 | -        | - | -        | KU350888 |
| <i>Catasetum rodigasianum</i>   | KU295271 | -        | -        | - | -        | -        |
| <i>Catasetum rooseveltianum</i> | KU295272 | KU295233 | -        | - | -        | KU350890 |
| <i>Catasetum x roseoalbum</i>   | KT768388 | KT768354 | KT768458 | - | -        | KT768494 |
| <i>Catasetum saccatum</i>       | KU295273 | KU295234 | -        | - | EU441214 | KU350891 |
| <i>Catasetum sanguineum</i>     | KU295274 | -        | MF987507 | - | -        | KU350892 |
| <i>Catasetum spitzii</i>        | KU295275 | KU295235 | MF987508 | - | -        | -        |
| <i>Catasetum stenoglossum</i>   | KU295276 | KU295235 | -        | - | -        | KU350893 |
| <i>Catasetum tabulare</i>       | MF987491 | MF987480 | MF987509 | - | -        | MF987520 |
| <i>Catasetum uncatum</i>        | MF987492 | -        | MF987510 | - | -        | -        |
| <i>Catasetum viridiflavum</i>   | KU295277 | KU295237 | -        | - | -        | MF987521 |

|                                      |                 |                 |                 |                 |          |                 |
|--------------------------------------|-----------------|-----------------|-----------------|-----------------|----------|-----------------|
| <i>Caucaea cucullata</i>             | AF432952        | -               | -               | AF433005        | AF433024 | -               |
| <i>Chytroglossa aurata</i>           | -               | -               | -               | FJ564753        | -        | FJ563245        |
| <i>Chytroglossa marileoniae</i>      | DQ210301        | -               | -               | FJ565112        | FJ562408 | -               |
| <i>Cischweinfia colombiana</i>       | FJ565464        | -               | -               | -               | -        | -               |
| <b><i>Clowesia amazonica</i></b>     | -               | -               | -               | -               | -        | <b>KU350895</b> |
| <b><i>Clowesia dodsoniana</i></b>    | <b>MF987493</b> | <b>MF987481</b> | <b>MF987511</b> | KF660299        | -        | KF660524        |
| <i>Clowesia rosea</i>                | U257701         | <b>KU257693</b> | -               | -               | -        | -               |
| <i>Clowesia russelliana</i>          | KT768389        | -               | -               | -               | -        | KT768495        |
| <i>Clowesia thylaciochila</i>        | LK054140        | -               | -               | -               | -        | -               |
| <i>Comparettia langkastii</i>        | FJ565460        | -               | -               | FJ563962        | FJ562383 | -               |
| <i>Comparettia macroplectron</i>     | AF350541        | -               | -               | AF350620        | AF350699 | -               |
| <i>Comparettia schaeferi</i>         | FJ565337        | -               | -               | FJ563932        | FJ562368 | -               |
| <i>Cuitlauzina candida</i>           | EF079417        | -               | -               | EF079217        | FJ562416 | -               |
| <b><i>Cyanaeorchis arundinae</i></b> | <b>KF771816</b> | <b>KF771816</b> | -               | <b>KF771820</b> | -        | <b>KU257725</b> |
| <b><i>Cyanaeorchis minor</i></b>     | <b>KF771818</b> | <b>KF771818</b> | -               | <b>KF771822</b> | -        | <b>KU350898</b> |
| <i>Cyanaeorchis praetermissa</i>     | KF771819        | -               | -               | KF771823        | -        | -               |
| <i>Cycnoches aureum</i>              | KT768390        | KT768355        | KT768459        | -               | -        | KT768496        |
| <i>Cycnoches barthiorum</i>          | KT768391        | KT768356        | KT768460        | -               | -        | KT768497        |
| <i>Cycnoches chlorochilon</i>        | KT768392        | KT768357        | KT768461        | -               | -        | KT768498        |
| <i>Cycnoches cooperi</i>             | KT768393        | KT768358        | KT768462        | KF660301        | -        | KT768499        |
| <i>Cycnoches densiflorum</i>         | KT768394        | KT768359        | KT768463        | -               | -        | -               |
| <i>Cycnoches diana</i>               | KT768395        | KT768360        | KT768464        | -               | -        | KT768501        |
| <i>Cycnoches egertonianum</i>        | KM598425        | KT768360        | KT768464        | EU214159        | EU214159 | KT768501        |
| <i>Cycnoches guttulatum</i>          | KT768398        | KT768363        | KT768467        | -               | -        | KT768504        |
| <i>Cycnoches haagii</i>              | KU257702        | KT768364        | KT768468        | -               | -        | -               |
| <i>Cycnoches herrenhusanum</i>       | KU257703        | KT768365        | KT768469        | -               | -        | KT768506        |
| <i>Cycnoches lehmannii</i>           | KT768401        | KT768366        | KT768470        | KF660266        | -        | KT768507        |
| <i>Cycnoches loddigesii</i>          | KT768402        | KT768367        | KT768471        | -               | -        | KT768508        |
| <i>Cycnoches manoelae</i>            | KT768403        | KT768368        | KT768472        | KF660254        | -        | KT768509        |

|                                     |          |          |          |          |          |                 |
|-------------------------------------|----------|----------|----------|----------|----------|-----------------|
| <i>Cycnoches pachydactylon</i>      | KT768404 | KT768369 | KT768473 | KF660258 | -        | KT768510        |
| <i>Cycnoches pentadactylon</i>      | KU257704 | KT768369 | KT768473 | -        | -        | KT768510        |
| <i>Cycnoches peruvianum</i>         | KT768405 | KT768372 | KT768475 | -        | -        | KT768513        |
| <i>Cycnoches quatuorcristis</i>     | MF285500 | MF285467 | -        | -        | -        | -               |
| <i>Cycnoches suarezii</i>           | KT768408 | KT768374 | KT768476 | -        | -        | KT768515        |
| <i>Cycnoches ventricosum</i>        | KT768409 | KT768375 | KT768477 | -        | -        | -               |
| <i>Cycnoches warszewiczii</i>       | KT768410 | KT768376 | KT768478 | EU214322 | -        | KT768517        |
| <i>Cymbidiella pardalina</i>        | AF470489 | -        | -        | AF470459 | -        | -               |
| <i>Cymbidium devonianum</i>         | AF470515 | -        | -        | -        | -        | -               |
| <i>Cymbidium eburneum</i>           | AF284709 | -        | KT768479 | -        | -        | -               |
| <i>Cymbidium tracyanum</i>          | KT768412 | -        | -        | -        | -        | -               |
| <i>Cymbidium wenshanense</i>        | AF284708 | -        | -        | -        | -        | -               |
| <i>Cyrtochiloides cardiochila</i>   | AF432947 | -        | -        | AF433011 | AF433030 | -               |
| <i>Cyrtochilum aurantiacum</i>      | AF350872 | -        | -        | AF433008 | AF433027 | -               |
| <i>Cyrtochilum cimiciferum</i>      | AF350560 | -        | -        | AF350639 | AF350718 | -               |
| <i>Cyrtochilum edwardii</i>         | AF350557 | -        | -        | FJ565148 | AF350715 | -               |
| <i>Cyrtochilum graminoides</i>      | AF350875 | -        | -        | AF433013 | AF433032 | -               |
| <i>Cyrtochilum meirax</i>           | AF432959 | -        | -        | AF433016 | AF433035 | -               |
| <b><i>Cyrtopodium aliciae</i></b>   | EU877156 | -        | -        | -        | -        | <b>KU350900</b> |
| <i>Cyrtopodium andersonii</i>       | AF470490 | -        | MF285528 | KF660267 | -        | KF660329        |
| <i>Cyrtopodium glutiniferum</i>     | -        | -        | -        | -        | -        | MF285554        |
| <b><i>Cyrtopodium holstii</i></b>   | -        | -        | -        | -        | -        | <b>KU350901</b> |
| <i>Cyrtopodium longibulbosum</i>    | -        | -        | -        | KF660285 | -        | KF660453        |
| <i>Cyrtopodium macrobulbon</i>      | -        | -        | -        | LN609766 | -        | -               |
| <i>Cyrtopodium punctatum</i>        | AF239412 | -        | -        | AF239508 | AF239604 | KT750238        |
| <b><i>Cyrtopodium virescens</i></b> | -        | -        | -        | -        | -        | <b>KU350902</b> |
| <i>Dipodium paludosum</i>           | KY988619 | -        | KT750227 | KT750201 | -        | KT750239        |
| <i>Dressleria dilecta</i>           | AF239411 | -        | GU004391 | EU214339 | AF239603 | KU257728        |
| <i>Dressleria fragrans</i>          | -        | -        | -        | KF660265 | -        | KF660327        |

|                                |          |          |          |          |          |          |
|--------------------------------|----------|----------|----------|----------|----------|----------|
| <i>Dressleria helleri</i>      | -        | -        | -        | KF660264 | -        | KF660326 |
| <i>Dressleria severiniana</i>  | MF285505 | -        | KU257721 | -        | -        | KU257729 |
| <i>Dressleria sp</i>           | KT768413 | KU25769  | -        | -        | -        | KU257730 |
| <i>Erycina glossomystax</i>    | FJ565586 | -        | -        | FJ565073 | FJ562398 | -        |
| <i>Eulophia acutilabra</i>     | KF318954 | -        | -        | LN831656 | -        | -        |
| <i>Eulophia angolensis</i>     | KF318932 | KU257698 | -        | KF358075 | -        | KU257731 |
| <i>Eulophia calanthoides</i>   | KF318896 | -        | -        | KF358107 | -        | -        |
| <i>Eulophia callichroma</i>    | KF318903 | -        | -        | -        | -        | -        |
| <i>Eulophia coeloglossa</i>    | KF318961 | -        | -        | -        | -        | -        |
| <i>Eulophia cucullata</i>      | KF318946 | -        | -        | -        | -        | -        |
| <i>Eulophia flava</i>          | JN114508 | -        | -        | -        | -        | -        |
| <i>Eulophia flavopurpurea</i>  | KF318930 | -        | -        | -        | -        | -        |
| <i>Eulophia graminea</i>       | AF284727 | -        | -        | KF358078 | -        | -        |
| <i>Eulophia guineensis</i>     | KF318960 | -        | -        | LN831662 | AF239605 | EU490745 |
| <i>Eulophia hereroensis</i>    | KF318940 | -        | -        | KF358066 | -        | -        |
| <i>Eulophia hians</i>          | KF318892 | -        | -        | KF358060 | -        | -        |
| <i>Eulophia horsfallii</i>     | KF318922 | -        | -        | LN831636 | -        | -        |
| <i>Eulophia livingstoneana</i> | LN831402 | -        | -        | LN849252 | -        | -        |
| <i>Eulophia longisepala</i>    | KF318918 | -        | -        | KF358086 | -        | -        |
| <i>Eulophia macowanii</i>      | KF318904 | -        | -        | KF358120 | -        | -        |
| <i>Eulophia meleagris</i>      | KF318936 | -        | -        | KF358083 | -        | -        |
| <i>Eulophia ovalis</i>         | KF318905 | -        | -        | KF358064 | -        | -        |
| <i>Eulophia parviflora</i>     | KF318893 | -        | -        | KF358062 | -        | -        |
| <i>Eulophia parvilabris</i>    | KF318927 | -        | -        | KF358130 | -        | -        |
| <i>Eulophia ruwenzoriensis</i> | EU877159 | -        | -        | -        | -        | -        |
| <i>Eulophia schnelliae</i>     | KF318891 | -        | -        | KF358126 | -        | -        |
| <i>Eulophia schweinfurthii</i> | KF318924 | -        | -        | KF358133 | -        | -        |
| <i>Eulophia speciosa</i>       | KF318967 | -        | -        | KF358123 | -        | -        |
| <i>Eulophia stachyodes</i>     | KF318953 | -        | -        | -        | -        | -        |

|                                  |          |          |          |          |          |                 |
|----------------------------------|----------|----------|----------|----------|----------|-----------------|
| <i>Eulophia streptopetala</i>    | KF318934 | -        | -        | EF079258 | -        | <b>MF987522</b> |
| <i>Eulophia tenella</i>          | KF318900 | -        | -        | KF358119 | -        | -               |
| <i>Eulophia tuberculata</i>      | KF318945 | -        | -        | KF358076 | -        | -               |
| <i>Eulophia zeyheriana</i>       | -        | -        | -        | KF358091 | -        | -               |
| <i>Fernandezia ecuadorensis</i>  | FJ565635 | -        | -        | FJ565127 | FJ562413 | -               |
| <i>Fernandezia ionanthera</i>    | FJ565236 | -        | -        | AF239486 | AF239582 | -               |
| <i>Fernandezia tica</i>          | FJ565453 | -        | -        | FJ564944 | DQ315917 | -               |
| <i>Galeandra batemanii</i>       | -        | EU877122 | -        | -        | -        | -               |
| <i>Galeandra baueri</i>          | EU877138 | EU877121 | -        | -        | -        | -               |
| <i>Galeandra beyrichii</i>       | EU877151 | EU877133 | -        | -        | -        | -               |
| <i>Galeandra blanchetii</i>      | EU877140 | EU877123 | -        | -        | -        | -               |
| <i>Galeandra cristata</i>        | -        | EU877124 | -        | -        | -        | -               |
| <i>Galeandra devoniana</i>       | EU877142 | KT768378 | -        | EU877181 | -        | KF660330        |
| <i>Galeandra greenwoodiana</i>   | EU877144 | EU877127 | -        | -        | -        | -               |
| <i>Galeandra junceaoides</i>     | EU877145 | EU877128 | -        | -        | -        | -               |
| <i>Galeandra leptoceras</i>      | -        | KU257699 | KU257722 | -        | -        | KX495755        |
| <i>Galeandra macroplectra</i>    | -        | -        | -        | -        | -        | KX495756        |
| <i>Galeandra magnicolumna</i>    | EU877146 | EU877129 | -        | -        | -        | -               |
| <b><i>Galeandra minax</i></b>    | EU877147 | EU877130 | -        | -        | -        | <b>KU350903</b> |
| <i>Galeandra paraguayensis</i>   | EU877153 | EU877134 | -        | -        | -        | -               |
| <i>Galeandra santarena</i>       | EU877143 | EU877126 | -        | -        | -        | -               |
| <i>Galeandra stangeana</i>       | EU877148 | EU877132 | -        | -        | -        | -               |
| <i>Galeandra stylomisantha</i>   | EU877154 | -        | -        | -        | -        | -               |
| <i>Geodorum densiflorum</i>      | LN831388 | -        | -        | JN004440 | -        | -               |
| <i>Geodorum recurvum</i>         | KF560539 | -        | -        | KF673833 | KF650564 | -               |
| <i>Gomesa dasytyle</i>           | AF350551 | -        | -        | AF350630 | AF350709 | -               |
| <i>Gomesa radicans</i>           | FJ565624 | -        | -        | FR832799 | FJ562410 | -               |
| <i>Grammatophyllum papuanum</i>  | -        | -        | -        | EF079262 | -        | -               |
| <i>Grammatophyllum speciosum</i> | AF470488 | -        | -        | AF470458 | -        | -               |

|                                      |          |                 |          |          |          |                 |
|--------------------------------------|----------|-----------------|----------|----------|----------|-----------------|
| <i>Grandiphyllum auricula</i>        | FJ565663 | -               | -        | FJ565155 | FJ562382 | -               |
| <i>Grandiphyllum divaricatum</i>     | FJ565455 | -               | -        | FJ564946 | FJ562381 | -               |
| <i>Grobya amherstiae</i>             | EU877158 | EU877137        | -        | -        | -        | -               |
| <b><i>Grobya cipoensis</i></b>       | -        | -               | KU295244 | -        | -        | -               |
| <b><i>Grobya fascifera</i></b>       | -        | -               | KU295245 | -        | -        | -               |
| <b><i>Grobya galeata</i></b>         | AF470487 | -               | KU295246 | AF470457 | -        | -               |
| <i>Hofmeisterella eumicroscopica</i> | AF350510 | -               | -        | FJ565091 | AF350668 | -               |
| <i>Ionopsis minutiflora</i>          | AF350548 | -               | -        | AF350627 | AF350706 | -               |
| <i>Lockhartia micrantha</i>          | FJ565172 | -               | -        | FJ564691 | FJ562347 | -               |
| <i>Macradenia rubescens</i>          | FJ565345 | -               | -        | FJ564839 | FJ562370 | -               |
| <i>Macroclinium aurorae</i>          | FJ565626 | -               | -        | FJ565118 | -        | -               |
| <i>Macroclinium dalstroemii</i>      | FJ565585 | -               | -        | FJ565072 | -        | -               |
| <i>Miltonia phymatochila</i>         | FJ565222 | -               | -        | FJ563856 | FJ562409 | -               |
| <i>Miltoniopsis roezlii</i>          | FJ565671 | -               | -        | FJ565165 | FJ562417 | FJ563833        |
| <i>Mormodes andreetae</i>            | LK054149 | -               | -        | -        | LK054186 | -               |
| <i>Mormodes aromatica</i>            | KM598430 | -               | -        | AY368417 | LK054209 | -               |
| <i>Mormodes badia</i>                | KT768415 | KT768380        | KT768484 | -        | LK054181 | KT768525        |
| <b><i>Mormodes buccinator</i></b>    | LK054148 | LK054148        | -        | -        | -        | <b>KU350904</b> |
| <i>Mormodes castroi</i>              | LK054150 | -               | -        | -        | LK054187 | -               |
| <i>Mormodes colossus</i>             | LK054157 | -               | -        | -        | LK054194 | -               |
| <b><i>Mormodes dasilvae</i></b>      | LK054151 | <b>LK054151</b> | -        | -        | LK054188 | <b>KU350905</b> |
| <b><i>Mormodes elegans</i></b>       | LK054152 | <b>LK054152</b> | -        | -        | LK054189 | -               |
| <i>Mormodes escobarii</i>            | LK054159 | -               | -        | -        | LK054196 | -               |
| <i>Mormodes fractiflexa</i>          | LK054160 | -               | -        | -        | LK054197 | -               |
| <i>Mormodes hookeri</i>              | LK054161 | -               | -        | -        | LK054198 | -               |
| <i>Mormodes horichii</i>             | LK054162 | -               | -        | -        | LK054199 | -               |
| <i>Mormodes ignea</i>                | LK054163 | -               | -        | -        | LK054200 | -               |
| <i>Mormodes lawrenceana</i>          | LK054146 | -               | -        | -        | -        | -               |
| <i>Mormodes lineata</i>              | LK054164 | -               | -        | -        | -        | -               |

|                                    |          |          |          |          |                 |                 |
|------------------------------------|----------|----------|----------|----------|-----------------|-----------------|
| <i>Mormodes lobulata</i>           | LK054165 | -        | -        | -        | LK054201        | -               |
| <i>Mormodes luxata</i>             | KT768417 | KT768382 | KT768486 | -        | -               | KT768527        |
| <i>Mormodes maculata</i>           | LK054170 | -        | -        | -        | LK054206        | -               |
| <i>Mormodes nagelii</i>            | LK054172 | -        | -        | -        | LK054208        | -               |
| <i>Mormodes oestlundiana</i>       | LK054144 | -        | -        | -        | LK054182        | -               |
| <b><i>Mormodes paraensis</i></b>   | LK054153 | LK054153 | -        | -        | <b>LK054190</b> | -               |
| <i>Mormodes pardalinata</i>        | LK054175 | -        | -        | -        | LK054210        | -               |
| <i>Mormodes punctata</i>           | KT768418 | KT768383 | KT750231 | -        | -               | -               |
| <i>Mormodes rolfeana</i>           | LK054156 | -        | -        | -        | -               | -               |
| <i>Mormodes sanguineoclaustra</i>  | LK054176 | -        | -        | -        | LK054211        | -               |
| <i>Mormodes skinneri</i>           | LK054167 | -        | -        | -        | LK054203        | -               |
| <i>Mormodes sotoana</i>            | LK054168 | -        | -        | -        | LK054204        | -               |
| <b><i>Mormodes tapoayensis</i></b> | LK054154 | -        | -        | -        | LK054191        | <b>KU350906</b> |
| <i>Mormodes tezontle</i>           | LK054145 | -        | -        | -        | LK054183        | -               |
| <i>Mormodes theiochlora</i>        | LK054147 | -        | -        | -        | LK054185        | -               |
| <i>Mormodes tuxtensis</i>          | LK054171 | -        | -        | -        | LK054207        | -               |
| <i>Mormodes uncia</i>              | LK054177 | -        | -        | -        | LK054212        | -               |
| <i>Mormodes variabilis</i>         | LK054169 | -        | -        | -        | -               | -               |
| <i>Mormodes warszewiczii</i>       | LK054155 | -        | -        | -        | LK054192        | -               |
| <i>Mormodes williamsii</i>         | LK054178 | -        | -        | -        | LK054213        | -               |
| <i>Nohawilliamsia orthostates</i>  | FJ565399 | -        | -        | FJ563950 | FJ562375        | -               |
| <i>Notylia barkeri</i>             | AF350545 | -        | -        | AF350624 | FJ564794        | -               |
| <i>Notylia ecuadorensis</i>        | FJ565477 | -        | -        | FJ564961 | FJ562385        | -               |
| <i>Notyliopsis beatricis</i>       | FJ565597 | -        | -        | FJ565086 | FJ562401        | -               |
| <i>Oeceoclades bernetii</i>        | KF318937 | -        | -        | KF358068 | -               | -               |
| <i>Oeceoclades maculata</i>        | KF318917 | -        | -        | -        | -               | -               |
| <i>Oeceoclades pulchra</i>         | KF318911 | -        | -        | KF358079 | -               | KT768523        |
| <i>Oliveriana brevilabia</i>       | FJ565321 | -        | -        | EF079202 | FJ562367        | -               |
| <i>Oncidium chrysomorphum</i>      | AF350796 | -        | -        | FJ564996 | AF433039        | -               |

|                                  |          |   |   |          |          |          |
|----------------------------------|----------|---|---|----------|----------|----------|
| <i>Oncidium epidendroides</i>    | AF350777 | - | - | FJ564802 | FJ562387 | -        |
| <i>Oncidium harryanum</i>        | EF079421 | - | - | EF079216 | AF350727 | -        |
| <i>Oncidium lehmannianum</i>     | FJ565395 | - | - | FJ564891 | FJ562373 | -        |
| <i>Oncidium multistellare</i>    | AF350729 | - | - | EF079213 | AF350729 | -        |
| <i>Oncidium noezlianum</i>       | AF350728 | - | - | EF079211 | AF350728 | -        |
| <i>Oncidium peruvianoides</i>    | FJ565512 | - | - | FJ564995 | FJ562392 | -        |
| <i>Oncidium sphacelatum</i>      | AF350564 | - | - | AF350643 | AF350722 | -        |
| <i>Oncidium strictum</i>         | AF350568 | - | - | FJ564985 | AF350726 | -        |
| <i>Ornithocephalus bicornis</i>  | FJ565564 | - | - | FJ565049 | FJ562397 | -        |
| <i>Ornithocephalus suarezii</i>  | FJ565560 | - | - | FJ565048 | FJ562396 | -        |
| <i>Orthochilus aculeatus</i>     | KF318949 | - | - | -        | -        | -        |
| <i>Orthochilus chloranthus</i>   | KF318939 | - | - | -        | -        | -        |
| <i>Orthochilus ensatus</i>       | KF318956 | - | - | -        | -        | -        |
| <i>Orthochilus foliosus</i>      | KF318920 | - | - | KF358101 | -        | -        |
| <i>Orthochilus leontoglossus</i> | KF318941 | - | - | KF358132 | -        | -        |
| <i>Orthochilus mechowii</i>      | KF318914 | - | - | -        | -        | -        |
| <i>Orthochilus odontoglossus</i> | KF318951 | - | - | -        | -        | -        |
| <i>Orthochilus tabularis</i>     | KF318907 | - | - | -        | -        | -        |
| <i>Otoglossum chiriquense</i>    | AF350561 | - | - | AF433017 | AF350719 | -        |
| <i>Otoglossum coronarium</i>     | EF079410 | - | - | FJ565100 | FJ562406 | -        |
| <i>Otoglossum harlingii</i>      | AF350879 | - | - | -        | -        | -        |
| <i>Phymatidium falcifolium</i>   | FJ565362 | - | - | -        | -        | -        |
| <i>Plectrophora cultrifolia</i>  | FJ565495 | - | - | -        | -        | -        |
| <i>Plectrophora triquetra</i>    | FJ565494 | - | - | -        | -        | -        |
| <i>Polyotidium huebneri</i>      | FJ565458 | - | - | FJ565458 | -        | -        |
| <i>Polystachya cultriformis</i>  | GU556643 | - | - | -        | -        | KF660306 |
| <i>Psychopsiella limminghei</i>  | FJ565660 | - | - | FJ565152 | -        | FJ563600 |
| <i>Psychopsis papilio</i>        | AF350582 | - | - | -        | AF350740 | -        |
| <i>Psychopsis sanderae</i>       | FJ565198 | - | - | -        | -        | -        |



|                                       |          |   |   |          |          |          |
|---------------------------------------|----------|---|---|----------|----------|----------|
| <i>Pterostemma antioquiense</i>       | FJ565396 | - | - | FJ563948 | FJ562374 | -        |
| <i>Rhynchostele londesboroughiana</i> | AF350530 | - | - | EF065561 | AF350688 | -        |
| <i>Rodriguezia arevaloi</i>           | FJ565331 | - | - | FJ564824 | -        | -        |
| <i>Rodriguezia delcastilloi</i>       | AF350543 | - | - | AF350622 | AF350701 | -        |
| <i>Rodriguezia satipoana</i>          | AF350544 | - | - | AF350544 | AF350702 | -        |
| <i>Solenidium lunatum</i>             | FJ565359 | - | - | FJ563940 | -        | -        |
| <i>Solenidium portillae</i>           | FJ565472 | - | - | FJ564956 | FJ562384 | -        |
| <i>Systemoglossum acuminatum</i>      | AF350528 | - | - | AF350607 | AF350686 | -        |
| <i>Systemoglossum bennettii</i>       | FJ565214 | - | - | FJ564728 | -        | -        |
| <i>Telipogon bowmanii</i>             | -        | - | - | DQ315912 | DQ315938 | -        |
| <i>Telipogon hystrix</i>              | DQ315841 | - | - | DQ315899 | DQ315925 | -        |
| <i>Telipogon nervosus</i>             | DQ315870 | - | - | HQ219263 | DQ315933 | -        |
| <i>Telipogon obovatus</i>             | FJ565603 | - | - | FJ565093 | -        | -        |
| <i>Telipogon pogonostalix</i>         | AF350511 | - | - | AF239488 | AF350669 | -        |
| <i>Telipogon pulcher</i>              | DQ315875 | - | - | DQ315910 | DQ315936 | -        |
| <i>Telipogon venustus</i>             | FJ565183 | - | - | FJ564703 | -        | -        |
| <i>Thysanoglossa jordanensis</i>      | EF079389 | - | - | EF079224 | -        | -        |
| <i>Tolumnia variegata</i>             | AF350533 | - | - | AF350612 | AF350691 | -        |
| <i>Trichoceros muralis</i>            | FJ565468 | - | - | FJ563966 | DQ315939 | FJ562901 |
| <i>Trichopilia brevis</i>             | AF350581 | - | - | EF079229 | AF350739 | -        |
| <i>Trichopilia fragrans</i>           | FJ565568 | - | - | FJ565053 | -        | -        |
| <i>Trichopilia sanguinolenta</i>      | AF350580 | - | - | -        | -        | -        |
| <i>Vitekorchis lucasiana</i>          | FJ565573 | - | - | -        | -        | -        |
| <i>Warmingia eugenii</i>              | FJ565196 | - | - | FJ563841 | -        | -        |
| <i>Zygostates alleniana</i>           | EF079390 | - | - | EF079225 | DQ315941 | -        |
| <i>Zygostates grandiflora</i>         | AF350508 | - | - | AF350587 | AF350666 | -        |

**Table S2.** Primer and PCR settings used for amplifying plastid and nuclear DNA loci.

| Loci          | Primer     | Sequence                            | Reference                              | Pre-melt     | Amplification                                    | Final extension | Number of amplification cycles |
|---------------|------------|-------------------------------------|----------------------------------------|--------------|--------------------------------------------------|-----------------|--------------------------------|
| ITS           | ITS 4      | TCC-TCC-GCT-TAT-TGA-TAT-GC          | Baldwin, 1992 <sup>12</sup>            | 95°C (3 min) | 95°C (30 secs) + 52°C (1 min) + 68°C (1 min)     | 68°C (10 min)   | 39                             |
|               | ITS 5      | GGA-AGT-AAA-AGT-CGT-AAC-AAG-G       |                                        | 95°C (3 min) | 95°C (30 secs) + 52°C (1 min) + 68°C (1 min)     | 68°C (10 min)   | 39                             |
| ETS           | EST-Orchid | CAT-ATG-AGT-TGT-TGC-GGA-CC (AT)-T   | Monteiro et al. 2010 <sup>13</sup>     | 95°C (3 min) | 95°C (30 secs) + 52°C (1 min) + 68°C (1 min)     | 68°C (10 min)   | 39                             |
|               | 18-IGS     | AGA-CAA-GCA-TAT-GAC-TAC-TGG-CAG-G   | Baldwin and Markos, 1998 <sup>14</sup> | 95°C (3 min) | 95°C (30 secs) + 52°C (1 min) + 68°C (1 min)     | 68°C (10 min)   | 39                             |
| <i>Xdh</i>    | X502F      | TGT-GAT-GTC-GAT-GTA-TGC             | Górniak et al. 2010 <sup>15</sup>      | 95°C (3 min) | 95°C (30 secs) + 53°C (1 min) + 68°C (1.5 min)   | 68°C (10 min)   | 39                             |
|               | X1599R     | G(AT)G-AGA-GAA-A(CT)TG-GAG-CAA-C    |                                        | 95°C (3 min) | 95°C (30 secs) + 53°C (1 min) + 68°C (1.5 min)   | 68°C (10 min)   | 39                             |
| <i>ycf1</i>   | 3720F      | TAC-GTA-TGT-AAT-GAA-CGA-ATG-G       | Neubig et al. 2009 <sup>16</sup>       | 95°C (3 min) | 95°C (30 secs) + 54°C (1 min) + 68°C (1.5 min)   | 68°C (10 min)   | 39                             |
|               | 5500R      | GCT-GTT-ATT-GGC-ATC-AAA-CCA-ATA-GCG |                                        | 95°C (3 min) | 95°C (30 secs) + 54°C (1 min) + 68°C (1.5 min)   | 68°C (10 min)   | 39                             |
| <i>trnS-G</i> | trn-S(GCU) | GCC-GCT-TTA-GTC-CAC-TCA-GC          | Hamilton, 1999 <sup>17</sup>           | 95°C (3 min) | 95°C (30 secs) + 51.5°C (1 min) + 68°C (1.5 min) | 68°C (10 min)   | 39                             |
|               | trn-G(UCC) | GAA-CGA-ATC-ACA-CTT-TTA-CCA-C       |                                        | 95°C (3 min) | 95°C (30 secs) + 51.5°C (1 min) + 68°C (1.5 min) | 68°C (10 min)   | 39                             |

**Table S3.** Alignment characterisation.

| <b>Partition</b> | <b>Model</b> | <b>Likelihood</b> |
|------------------|--------------|-------------------|
| ITS              | GTR+G        | -22881.15         |
| ETS              | TIM3+G       | -4003.25          |
| <i>Xdh</i>       | TPM2uf+G     | -3555.32          |
| <i>matK</i>      | TVM+G        | -14706.06         |
| <i>trnL-F</i>    | TPM1uf+G     | -10074.65         |
| <i>ycf1</i>      | TPM1uf+G     | -7596.36          |

**Table S4.** Likelihood of biogeographical models (DEC, DIVA, BAYAREA) as implemented in BIOGEOBEARS.

| <b>Model H<sub>1</sub></b> | <b>Model H<sub>0</sub></b> | <b>logL<sup>1</sup> H<sub>1</sub></b> | <b>logL H<sub>0</sub></b> | <b>D-statistic</b> | <b>p-value</b> | <b>AIC H<sub>1</sub></b> | <b>AIC H<sub>0</sub></b> |
|----------------------------|----------------------------|---------------------------------------|---------------------------|--------------------|----------------|--------------------------|--------------------------|
| DEC+J                      | DEC                        | -875.5                                | -893.9                    | 36.78              | 1.3e-09        | 1757                     | 1792                     |
| DIVALIKE+J                 | DIVALIKE                   | -912.3                                | -926.6                    | 28.62              | 8.8e-08        | 1831                     | 1857                     |
| <i>BAYAREALIKE+J</i>       | BAYAREALIKE                | <i>-860.3</i>                         | -931                      | 141.5              | 1.3e-32        | <i>1727</i>              | 1866                     |

<sup>1</sup>Log Likelihood

**Table S5.** Model selection and parameter values of BiSSE analysis on lineages with ESD and alternative sexual systems.

| <b>Model</b>          | <b>logL<sup>1</sup></b> | <b>AICc<sup>2</sup></b> | <b><math>\lambda^3</math> (0)</b> | <b><math>\lambda</math> (1)</b> | <b><math>\mu^4</math> (0)</b> | <b><math>\mu</math> (1)</b> | <b><math>q_{0-1}</math><sup>5</sup></b> | <b><math>q_{1-0}</math><sup>6</sup></b> |
|-----------------------|-------------------------|-------------------------|-----------------------------------|---------------------------------|-------------------------------|-----------------------------|-----------------------------------------|-----------------------------------------|
| <i>M</i> <sub>1</sub> | -262.414                | 531.022                 | -                                 | 2.2724                          | -                             | 2.1596                      | -                                       | 0.01347                                 |
| <i>M</i> <sub>2</sub> | <b>-248.854</b>         | <b>506.035</b>          | 1.2539                            | 2.0244                          | -                             | 1.1816                      | -                                       | 0.00586                                 |
| <i>M</i> <sub>3</sub> | -250.101                | 508.528                 | -                                 | 1.5893                          | 1.5308                        | 0.6345                      | -                                       | 0.00366                                 |
| <i>M</i> <sub>4</sub> | -260.683                | 529.691                 | -                                 | 2.2688                          | -                             | 2.1554                      | 0.02002                                 | 0.000001925                             |
| <i>M</i> <sub>5</sub> | -248.654                | 507.800                 | 1.2327                            | 2.0959                          | 1.1590                        | 1.2670                      | -                                       | 1.26707                                 |
| <i>M</i> <sub>6</sub> | -248.273                | 507.039                 | 1.2496                            | 2.0113                          | -                             | 1.1742                      | 0.00689                                 | 0.000002158                             |
| <i>M</i> <sub>7</sub> | -249.814                | 510.120                 | -                                 | 1.5992                          | 1.5393                        | 0.6592                      | 0.00403                                 | 0.000006212                             |
| <i>M</i> <sub>8</sub> | -247.921                | 508.538                 | 1.1827                            | 2.2634                          | 1.1007                        | 1.4974                      | 0.00904                                 | 0.000005874                             |

<sup>1</sup>log Likelihood

<sup>2</sup>Akaike Informative Criterion corrected

<sup>3</sup>Speciation rates

<sup>4</sup>Extinction rates

<sup>5</sup>transition rates from state 0 to 1

<sup>6</sup>transition rates from state 1 to 0

**Table S6.** Model selection and parameter values of BiSSE analysis on lineages pollinated by male euglossine bees and alternative pollination syndromes.

| Model | $\log L^1$      | AICc <sup>2</sup> | $\lambda^3$ (0) | $\lambda$ (1) | $\mu^4$ (0) | $\mu$ (1) | $q_{0-1}^5$ | $q_{1-0}^6$  |
|-------|-----------------|-------------------|-----------------|---------------|-------------|-----------|-------------|--------------|
| $M_1$ | -245.514        | 497.222           | -               | 2.2924        | -           | 2.1767    | -           | 0.0030665    |
| $M_2$ | <b>-240.045</b> | <b>488.416</b>    | 1.8276          | 2.1389        | -           | 1.8172    | -           | 0.0020853    |
| $M_3$ | -240.741        | 489.807           | -               | 2.0960        | 2.0865      | 1.7851    | -           | 0.0019566    |
| $M_4$ | -244.693        | 497.712           | -               | 2.2919        | -           | 2.1762    | 0.006970    | 0.000002017  |
| $M_5$ | -238.972        | 488.437           | 1.2969          | 2.4619        | 1.2625      | 2.1751    | -           | 2.1751137    |
| $M_6$ | -239.715        | 489.922           | 1.8364          | 2.1388        | -           | 1.8221    | 0.003017    | 0.000003762  |
| $M_7$ | -240.449        | 491.390           | -               | 2.1084        | 2.0950      | 1.8048    | 0.002745    | 0.0000034742 |
| $M_8$ | -238.273        | 489.241           | 1.2101          | 2.5350        | 1.1618      | 2.2638    | 0.006002    | 0.0000026449 |

<sup>1</sup>log Likelihood

<sup>2</sup>Akaike Informative Criterion corrected

<sup>3</sup>Speciation rates

<sup>4</sup>Extinction rates

<sup>5</sup>transition rates from state 0 to 1

<sup>6</sup>transition rates from state 1 to 0

**Table S7.** Model selection and parameter values of BiSSE analysis on epiphytic lineages and alternative plant habits.

| <b>Model</b>                | <b>logL<sup>1</sup></b> | <b>AICc<sup>2</sup></b> | <b><math>\lambda^3</math> (0)</b> | <b><math>\lambda</math> (1)</b> | <b><math>\mu^4</math> (0)</b> | <b><math>\mu</math> (1)</b> | <b><math>q_{0-1}</math><sup>5</sup></b> | <b><math>q_{1-0}</math><sup>6</sup></b> |
|-----------------------------|-------------------------|-------------------------|-----------------------------------|---------------------------------|-------------------------------|-----------------------------|-----------------------------------------|-----------------------------------------|
| <i>M</i> <sub>1</sub>       | -258.626                | 523.446                 | -                                 | 1.7808                          | -                             | 1.6653                      | -                                       | 0.01611                                 |
| <i>M</i> <sub>2</sub>       | -256.090                | 520.505                 | 1.2590                            | 1.5762                          | -                             | 1.2320                      | -                                       | 0.01462                                 |
| <i>M</i> <sub>3</sub>       | -256.221                | 520.768                 | -                                 | 1.5223                          | 1.5019                        | 1.1720                      | -                                       | 0.01326                                 |
| <i>M</i> <sub>4</sub>       | -257.123                | 522.572                 | -                                 | 1.7813                          | -                             | 1.6656                      | 0.04960                                 | 0.000579                                |
| <i>M</i> <sub>5</sub>       | -255.714                | 521.919                 | 1.1414                            | 1.6908                          | 1.1089                        | 1.4030                      | -                                       | 1.40300                                 |
| <b><i>M</i><sub>6</sub></b> | <b>-253.720</b>         | <b>517.931</b>          | 1.2762                            | 1.5697                          | -                             | 1.2374                      | 0.02558                                 | 0.00001974                              |
| <i>M</i> <sub>7</sub>       | -254.303                | 519.098                 | -                                 | 1.5598                          | 1.5259                        | 1.2443                      | 0.02234                                 | 0.00002881                              |
| <i>M</i> <sub>8</sub>       | -253.018                | 518.731                 | 0.8744                            | 1.7400                          | 0.8010                        | 1.4450                      | 0.043234                                | 0.00016626                              |

<sup>1</sup>log Likelihood

<sup>2</sup>Akaike Informative Criterion corrected

<sup>3</sup>Speciation rates

<sup>4</sup>Extinction rates

<sup>5</sup>transition rates from state 0 to 1

<sup>6</sup>transition rates from state 1 to 0

## Supplementary figures

**Fig. S1.** Conflicting nuclear-plastid associations (i.e. pair of nuclear / plastid taxa) obtained by PACo analysis, using Bayesian posterior probability trees. Taxa with normalised squared residual scores above the threshold value (red line) indicate potential conflicting associations.

**Fig. S2.** Phylogenetic relationships of Catasetinae and sister subtribes (Eulophiinae, Dipodiinae, Oncidiinae, Cyrtopodiinae, Cymbidiinae) independently derived from nuclear and plastid datasets. potential outlier, congruent and excluded terminals (i.e. taxa with sequences included on the plastid loci but missing on the nuclear dataset prior analysis) are shown in red, green and blue, respectively.

**Fig. S3.** Best scoring ML tree of Catasetinae and sister subtribes (Eulophiinae, Dipodiinae, Oncidiinae, Cyrtopodiinae, Cymbidiinae) obtained from non-conflicting concatenated nuclear and plastid loci. Node charts indicate Bootstrap Support (BS > 75), where fully black diagrams indicate BS of 100.

**Fig. S4.** Chronogram of Catasetinae and sister subtribes obtained under a relaxed clock model, applied to a non-conflicting, concatenated nuclear and plastid loci. Minimum and maximum age intervals are provided. MRCA of Catasetinae as well as multiple origins of ESD are shown.

**Fig. S5.** Probabilities of areas estimated as inferred under the BayArea+J model using a relaxed clock model dated phylogeny. Grey colours at pie diagrams indicate probabilities of shared ancestral areas (i.e. two or more biogeographical regions) estimated at nodes. The LCA of Catasetinae is indicated with a black star and gains of ESD are indicated with red circles. Coded biogeographical areas are colour-coded following inset map, and are shown in front of taxa names (grey colours indicate taxa



distributed in more than one biogeographical region). Sub-tribe members sampled in our phylogeny are color-coded. Right panels show selected representatives of (a) Cymbidiinae (*Grammatophyllum measuresianum*); (b) Cyrtopodiinae (*Cyrtopodium polyphyllum*); (c) Eulophiinae (*Eulophia streptopetala*); (d, e, f) Catasetinae (*Catasetum fimbriatum*, *Galeandra macroplectron*, and *Mormodes punctata*, respectively); (h, i) Oncidiinae (*Trichoceros* sp., *Rossioglossum grande*). Photos (except b by L. Varella): O. Pérez. [Inset: Codes areas used for biogeographical analysis. Geopolitical boundaries map generated by ArcMAP (<http://www.sri.com>) using political divisions and elevation data from DIVA-GIS (<http://www.diva-gis.org/data>)].

**Fig. S6.** Maximum Likelihood optimisation (1000 iterations) under an Asymmetrical Rate Model (ARD) of Environmental Sex Determination (ESD) of Catasetinae on a BEAST maximum credibility clade chronogram. Posterior probabilities of each state are shown at nodes. The LCA of Catasetinae is indicated with a black star.

**Fig. S7.** Bioclimatic variables and their corresponding contributions to Axis 1 (47.9% variance) of PCA analysis. Note that there is no evident discrimination between temperature and seasonality.

**Fig. S8.** Bioclimatic variables and their corresponding contributions to Axis 2 (23.6% variance) of PCA analysis. Note that there is no evident discrimination between temperature and seasonality.

**Fig. S9.** Presence and absence of Environmental Sex Determination overlaid on: (a) A Principal Component Analysis (PCA), and (b) a non-dimensional metric scaling analyses (NMDS) plot. Note that in both analyses, climatic niche spaces of lineages

with and without ESD overlap (normal confidence ellipses drawn at a confidence level of 0.95 largely intersect).

**Fig. S10.** Mean ancestral values and 95% confidence intervals (CI) of bioclimatic variables estimated at all nodes of the Catasetinae phylogeny by ACE analyses. (A) Altitude; (B) Annual mean temperature (Bio 1); (C) Mean diurnal range (Bio 2); (D) Isothermality (Bio 3); (E) Temperature seasonality (Bio 4); (F) Maximum temperature of warmest month (Bio 5); (G) Maximum temperature of coldest month (Bio 6); (H) Temperature annual range (Bio 7); (I) Mean temperature of wettest quarter (Bio 8); (J) Mean temperature of driest quarter (Bio 9); (K) Mean temperature of warmest quarter (Bio 10); (L) Mean temperature of coldest quarter (Bio 11); (M) Annual precipitation (Bio 12); (N) Precipitation of wettest month (Bio 13); (O) Precipitation of driest month (Bio 14); (P) Precipitation seasonality (Bio 15); (Q) Precipitation of wettest quarter (Bio 16); (R) Precipitation of driest quarter (Bio 17); (S) Precipitation of warmest quarter (Bio 18); (T) Precipitation of coldest quarter (Bio 19). Mean ancestral values are indicated by red bars. Blue circles represent mean ancestral values at ancestors where ESD originated independently. Blue bars indicate CI of ancestral values at nodes with ESD as inferred by character state estimation analyses, and orange bars indicate CI of mean ancestral values at nodes without ESD. Note the little differences between ancestral mean values of bioclimatic variables in nodes inferred to have ESD, and those inferred to have alternative sexual systems (i.e. absence of ESD).

**Fig. S11.** Density probability plots of speciation rates (A); differences in speciation and extinction rates (B); net diversification rates (C), and differences in net diversification rates (D) in lineages with Environmental Sex Determination and alternative sexual systems as inferred by BiSSE.

**Fig. S12.** Density probability plots of speciation rates (A); differences in speciation and extinction rates (B); net diversification rates (C), and differences in net diversification rates (D) in euglossine-bee pollinated lineages and alternative pollination syndromes as inferred by BiSSE.

**Fig. S13.** Density probability plots of speciation rates (A); differences in speciation and extinction rates (B); net diversification rates (C), and differences in net diversification rates (D) in epiphytic lineages and those with other habits as inferred by BiSSE.

**Fig. S14.** Null distribution of AIC of BiSSE simulations in A) ESD, and B) euglossine-bee pollination syndrome.

Figure S1

Association

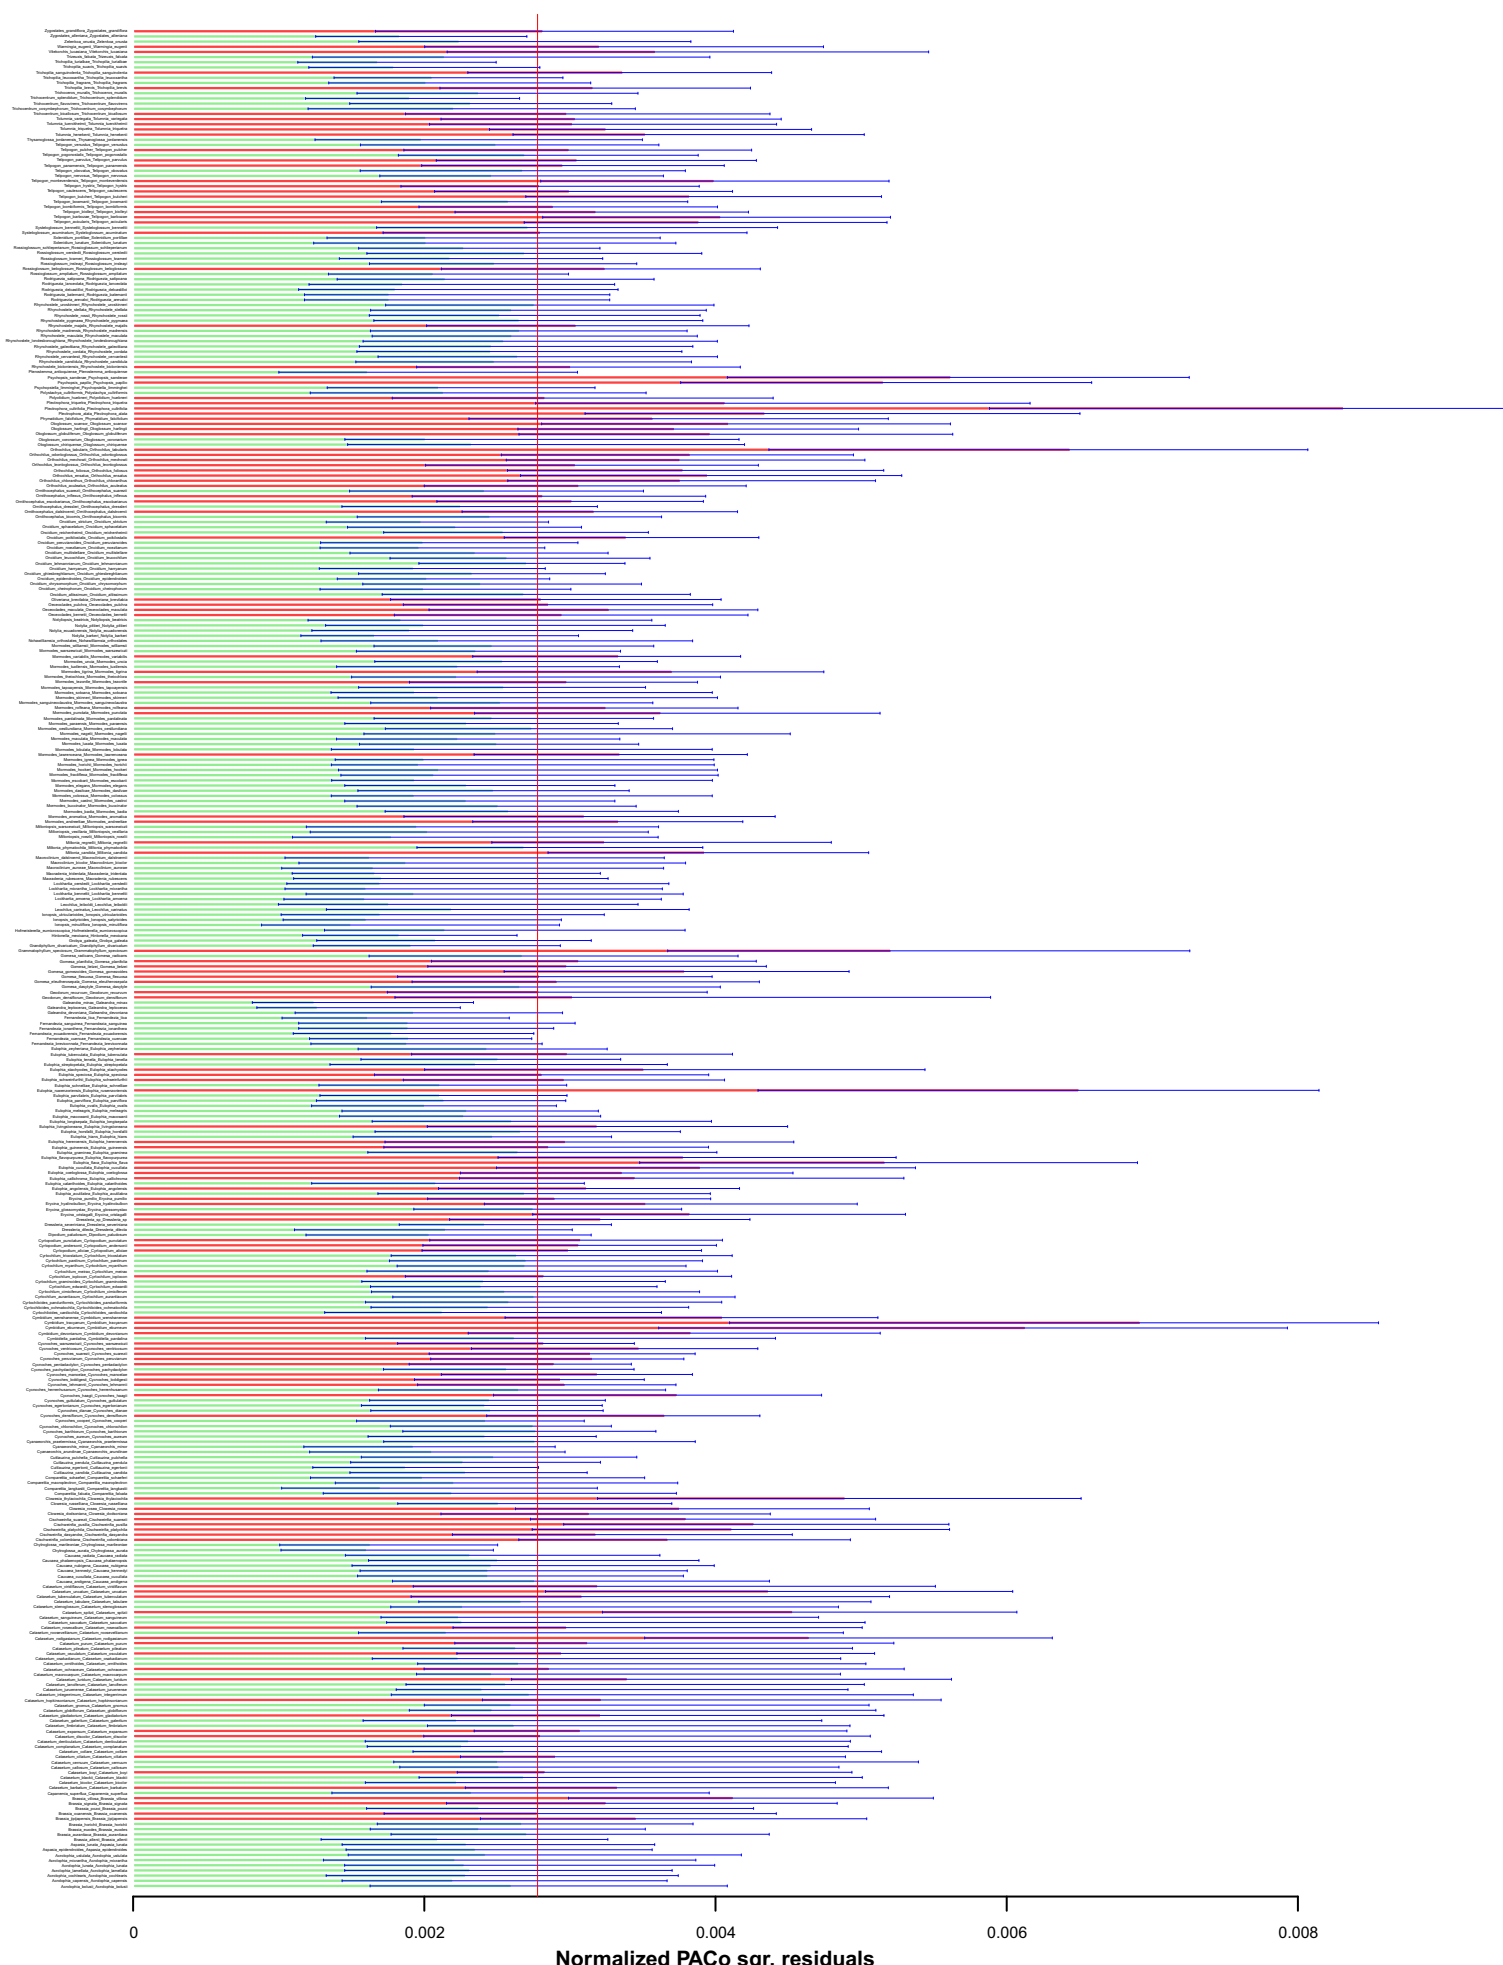

Figure S2

ITS - ETS - *Xdh* ML consensus ML tree

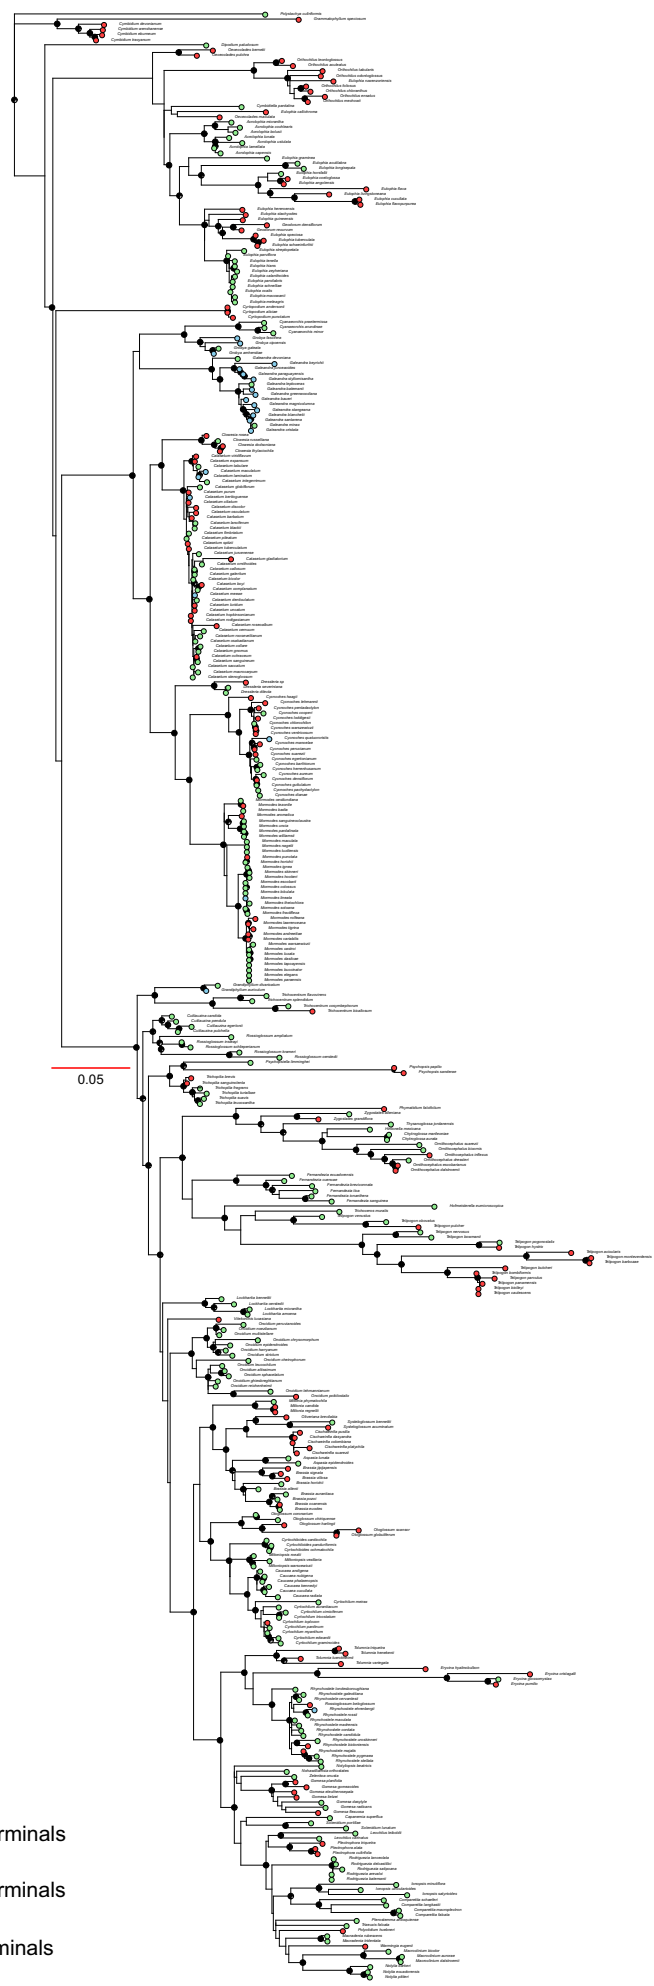

*matK* - *trnL-F* - *ycf1* ML consensus ML tree

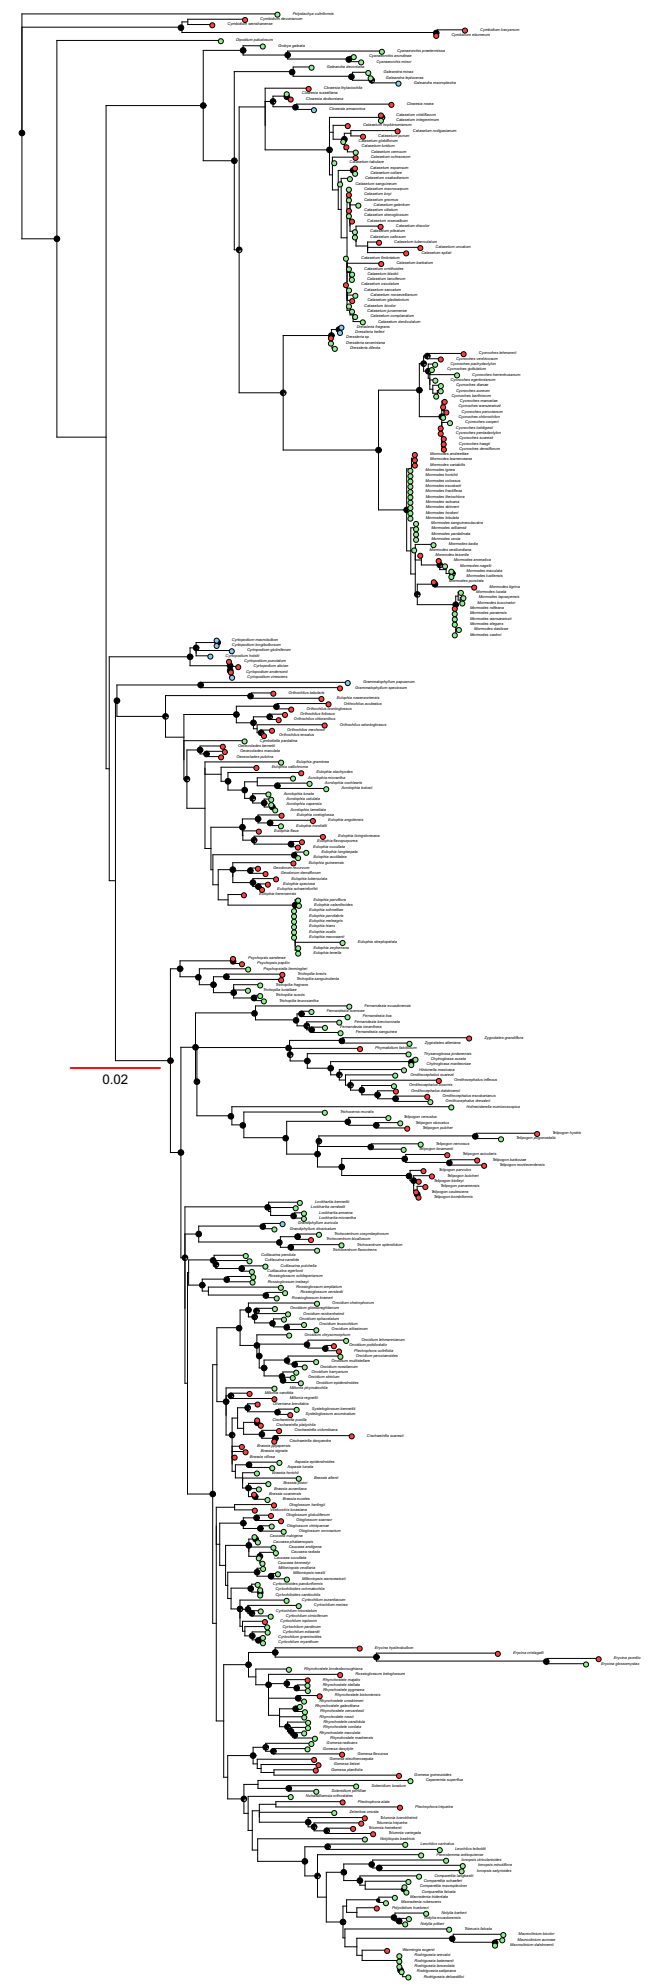

- Congruent terminals
- Conflicting terminals
- Excluded terminals

Figure S3

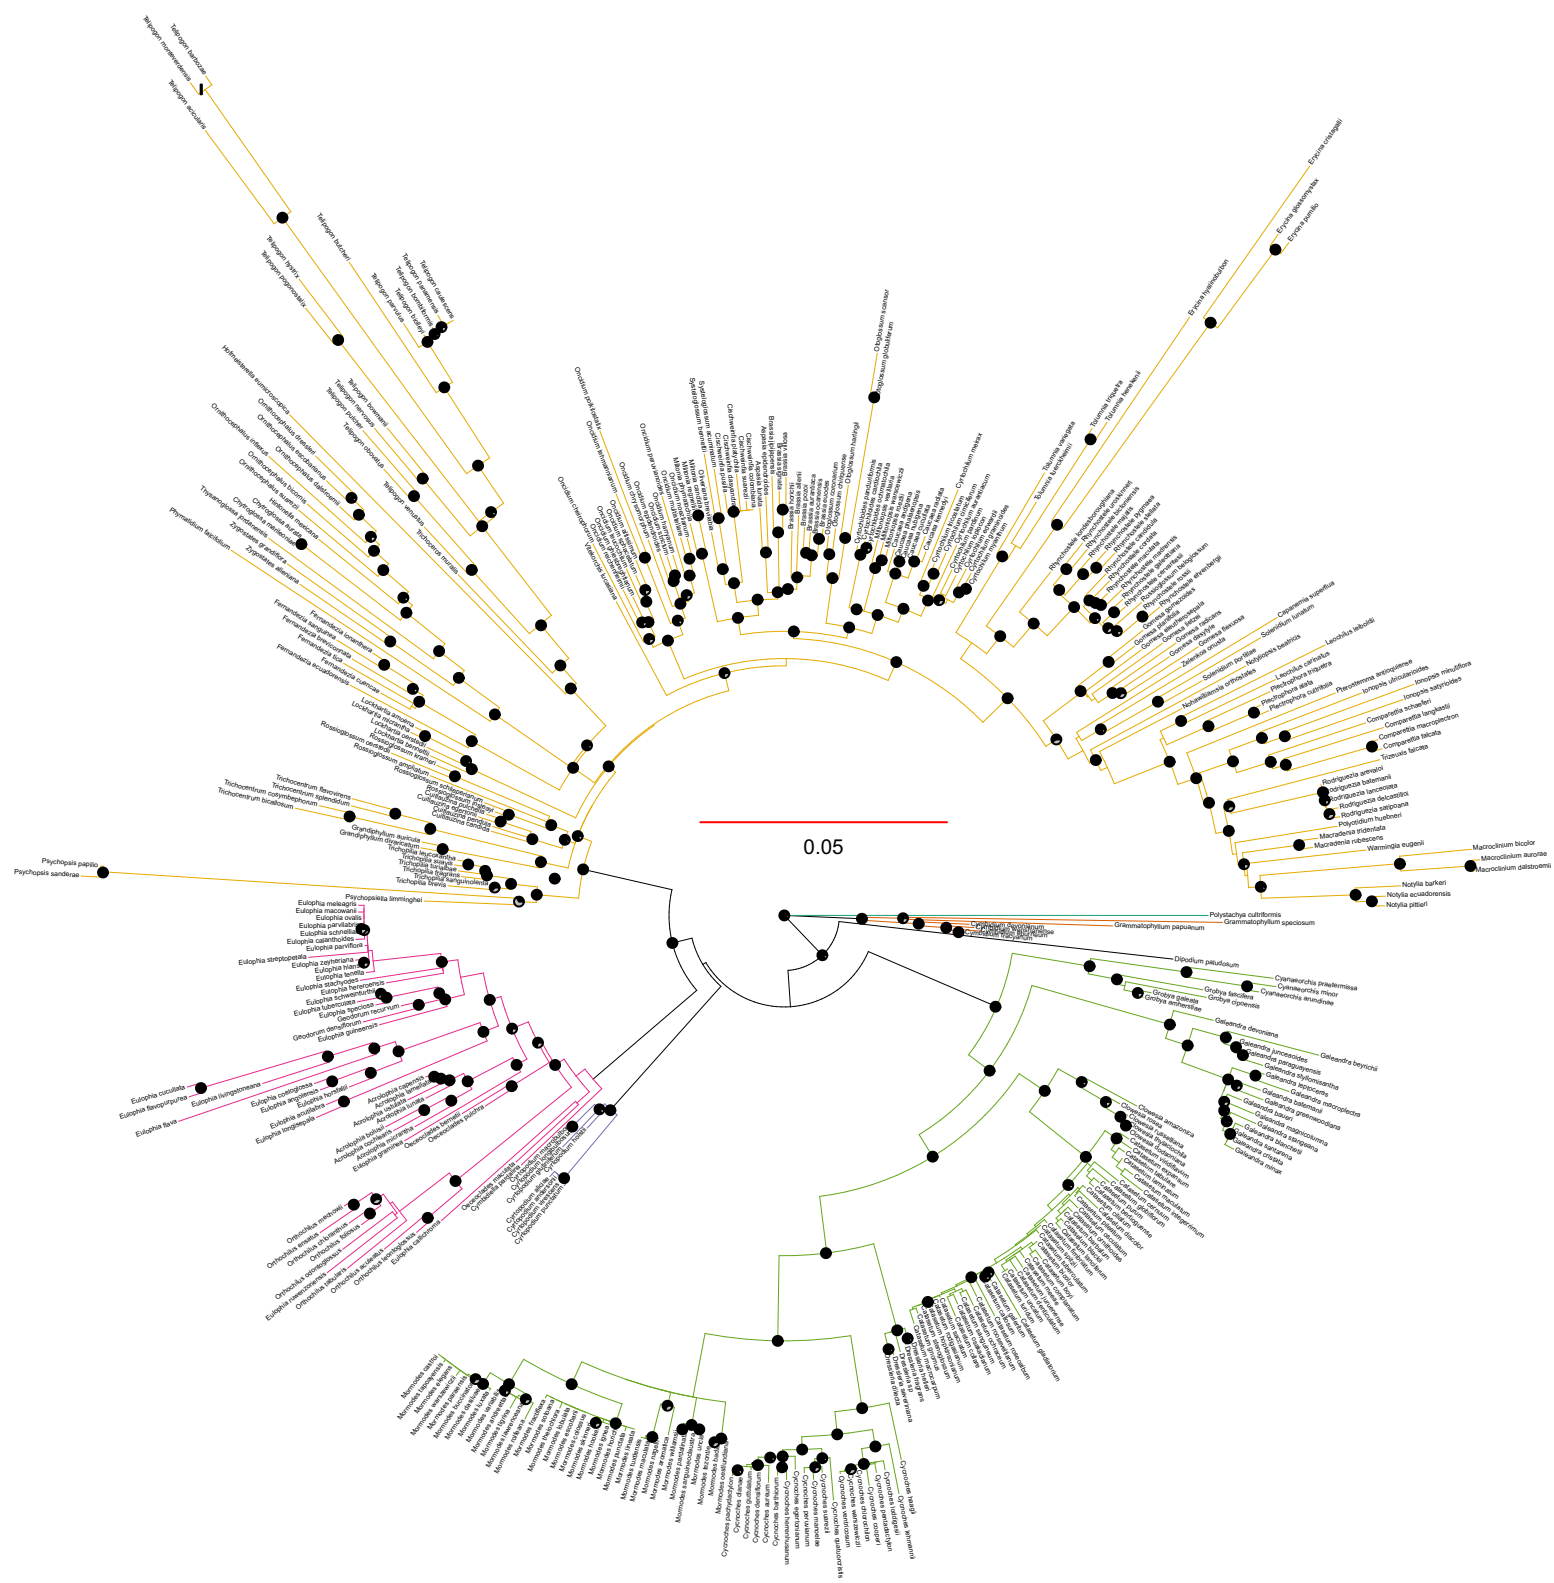

Figure S4

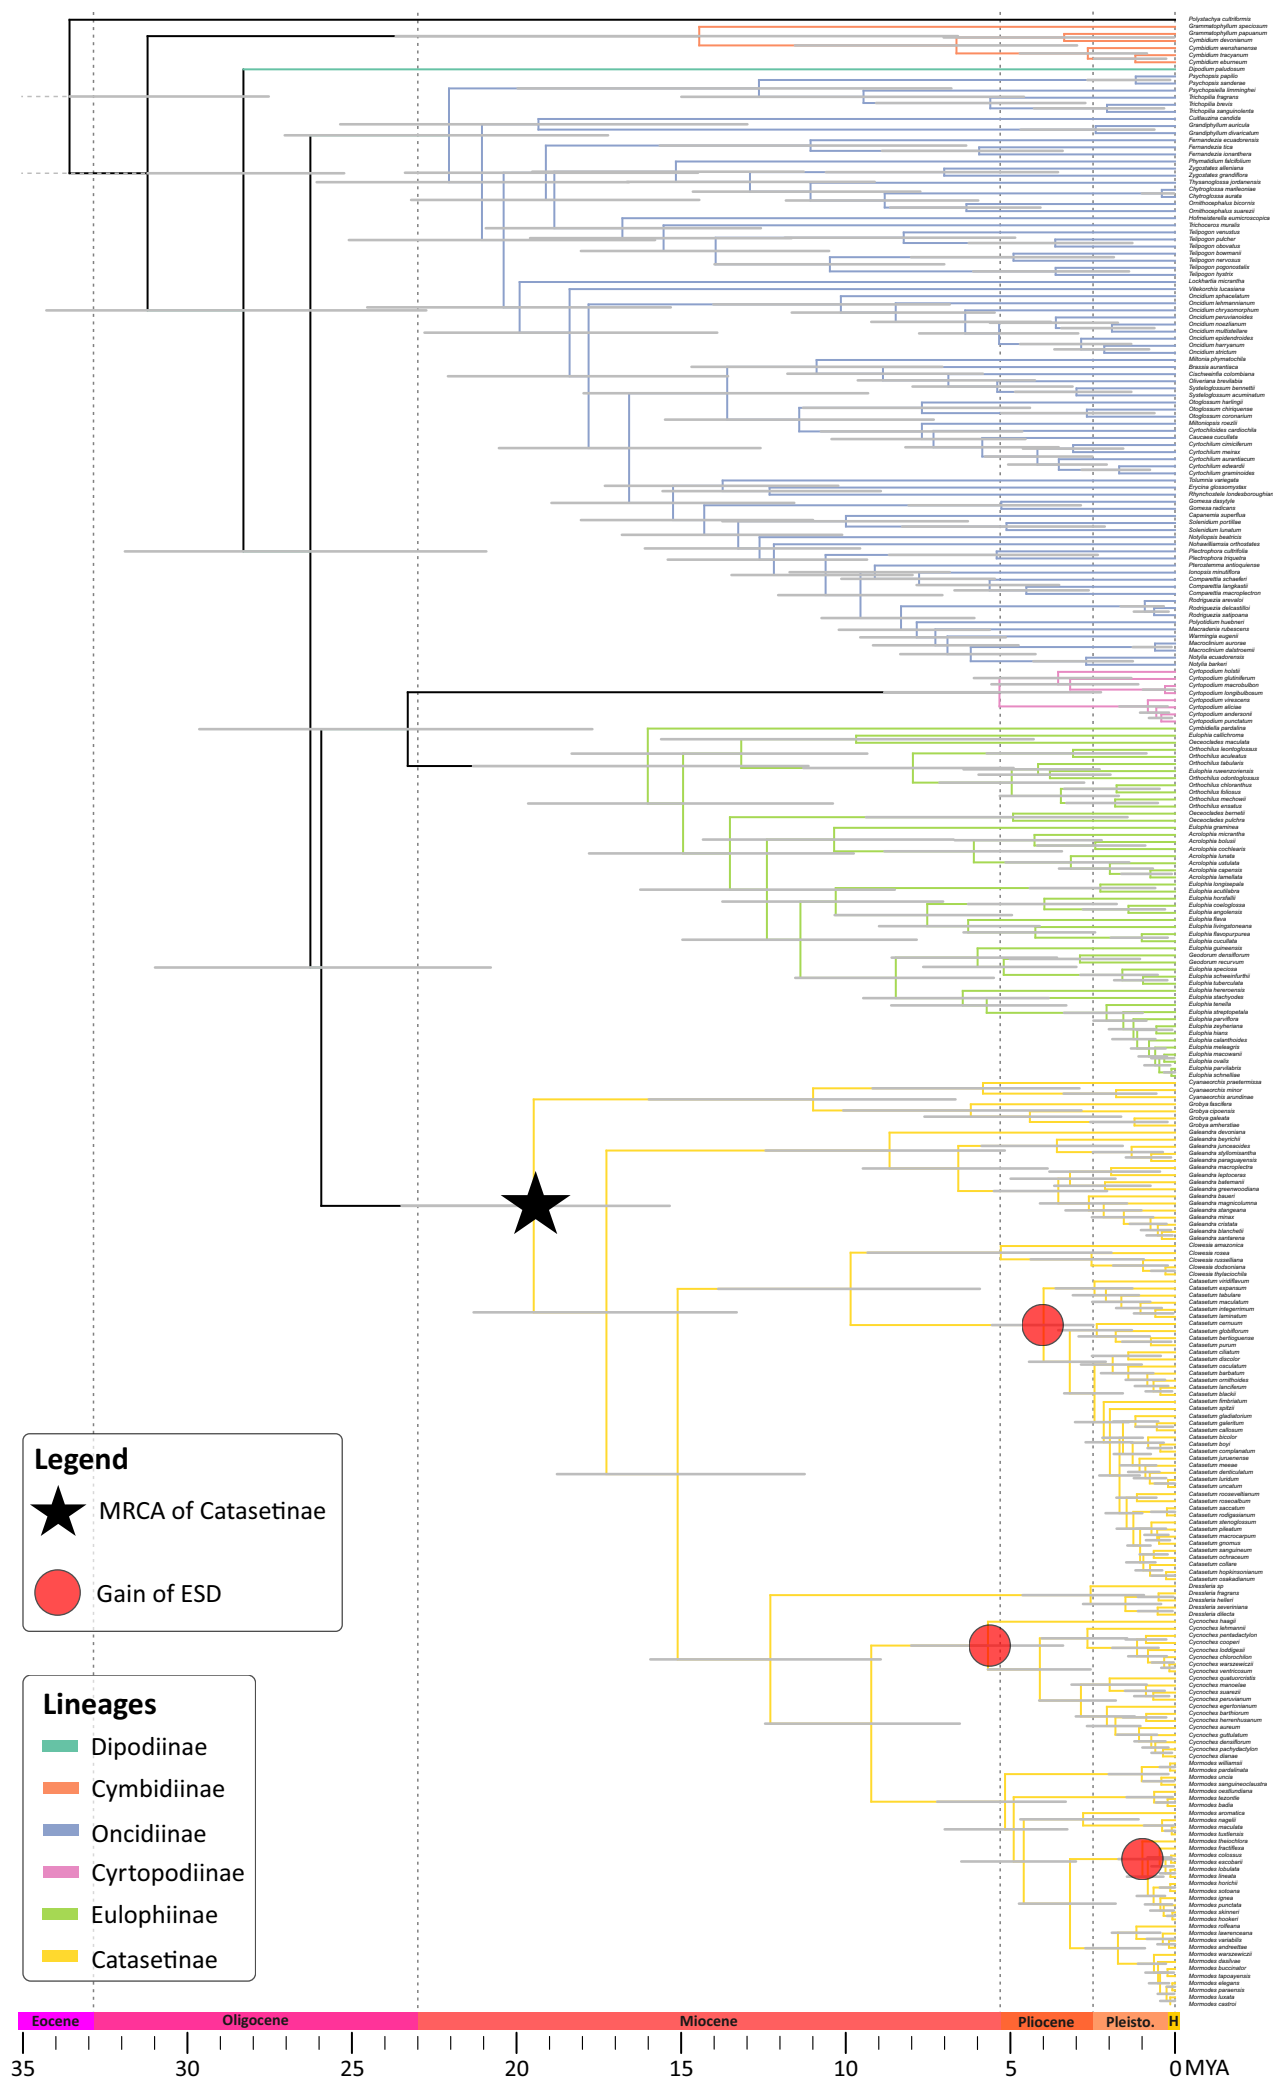

**Legend**

- ★ MRCA of Catasetinae
- Gain of ESD

**Lineages**

- Dipodiinae
- Cymbidiinae
- Oncidiinae
- Cyrtopodiinae
- Eulophiinae
- Catasetinae

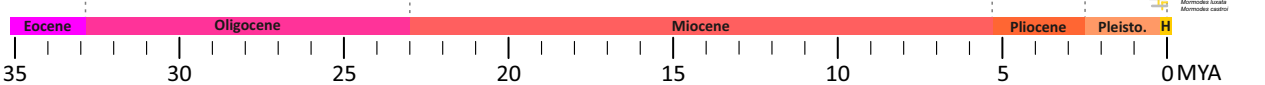

Figure S5

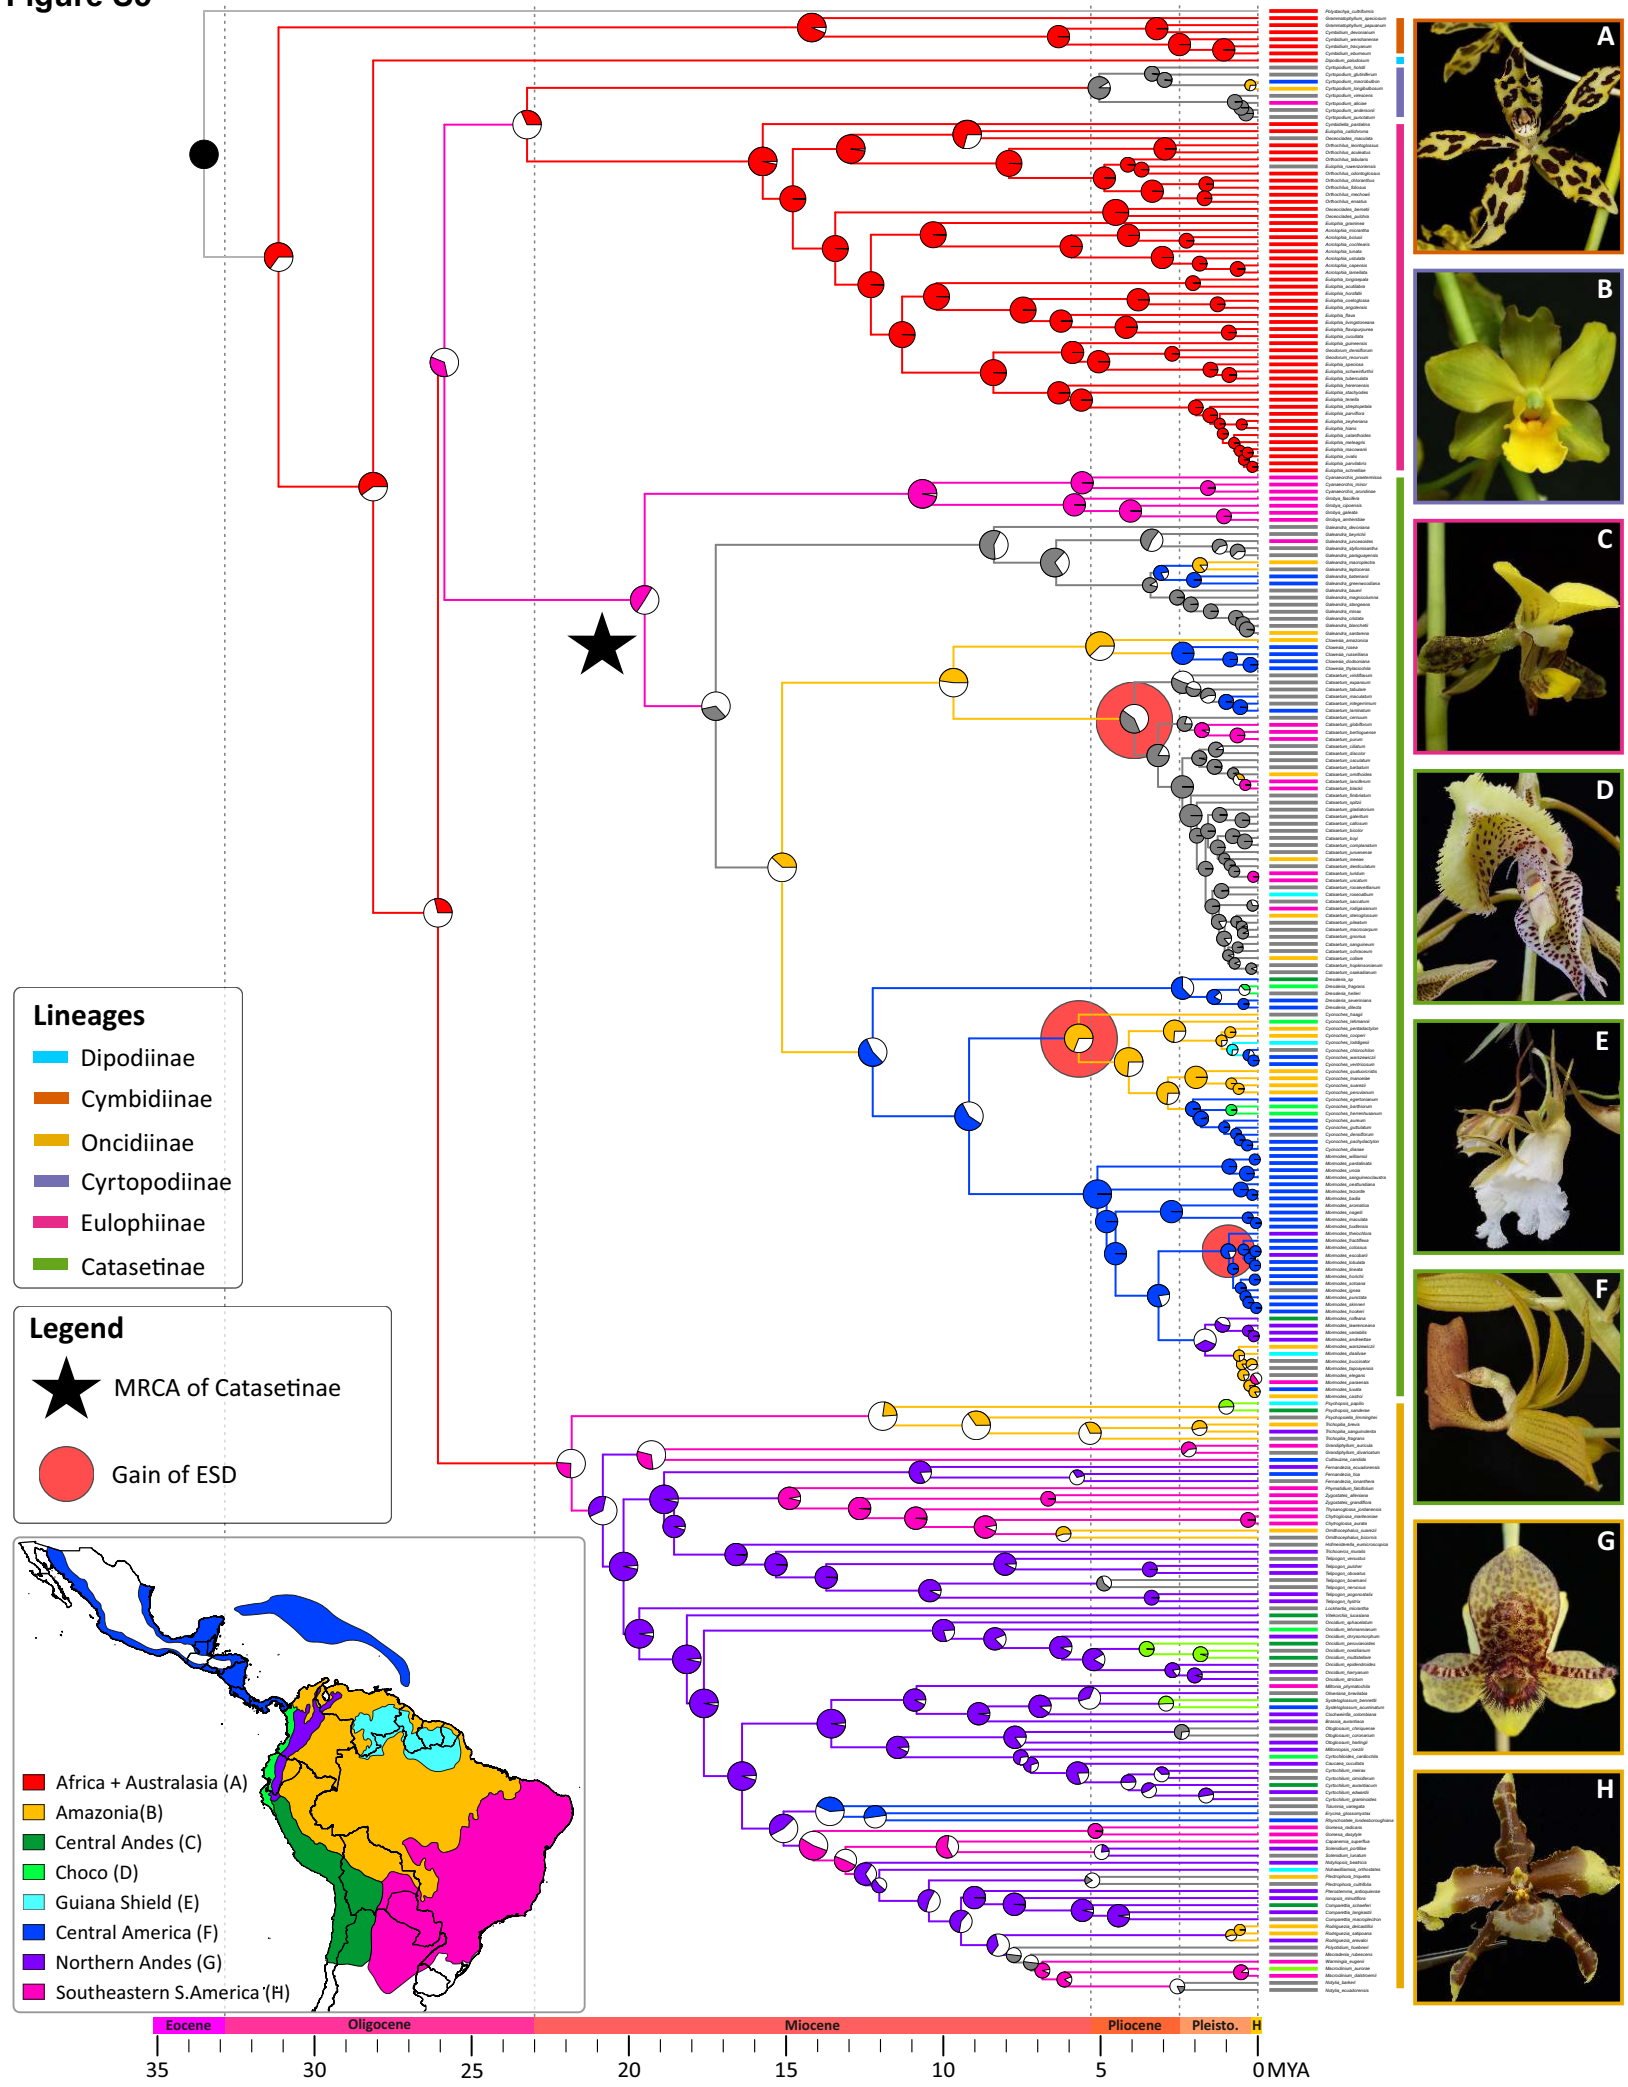



Figure S6

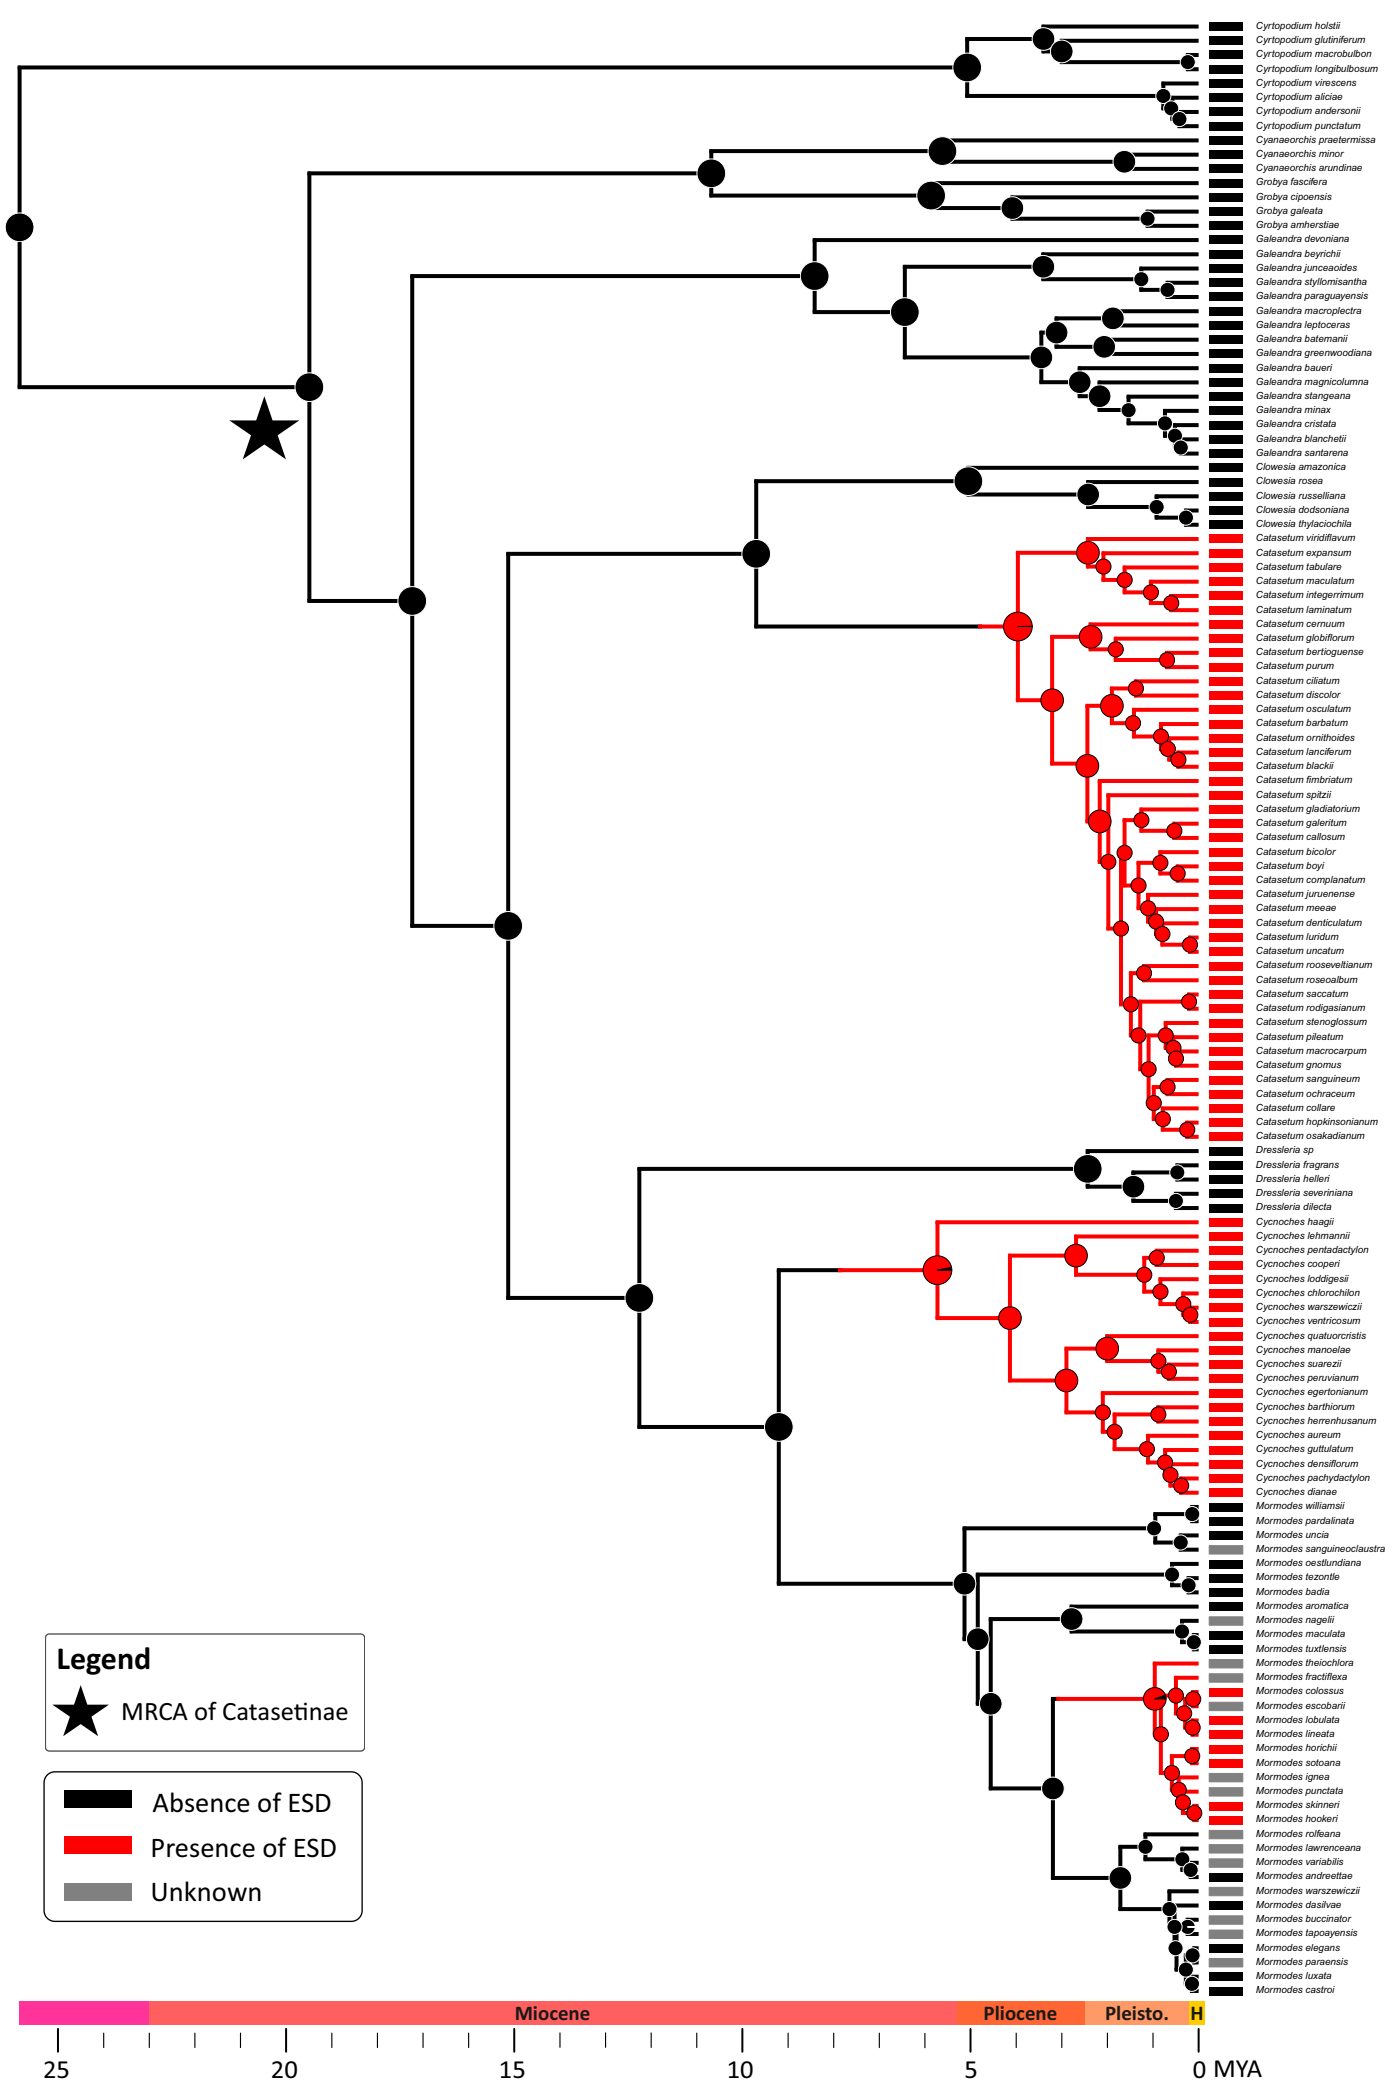

**Figure S7**

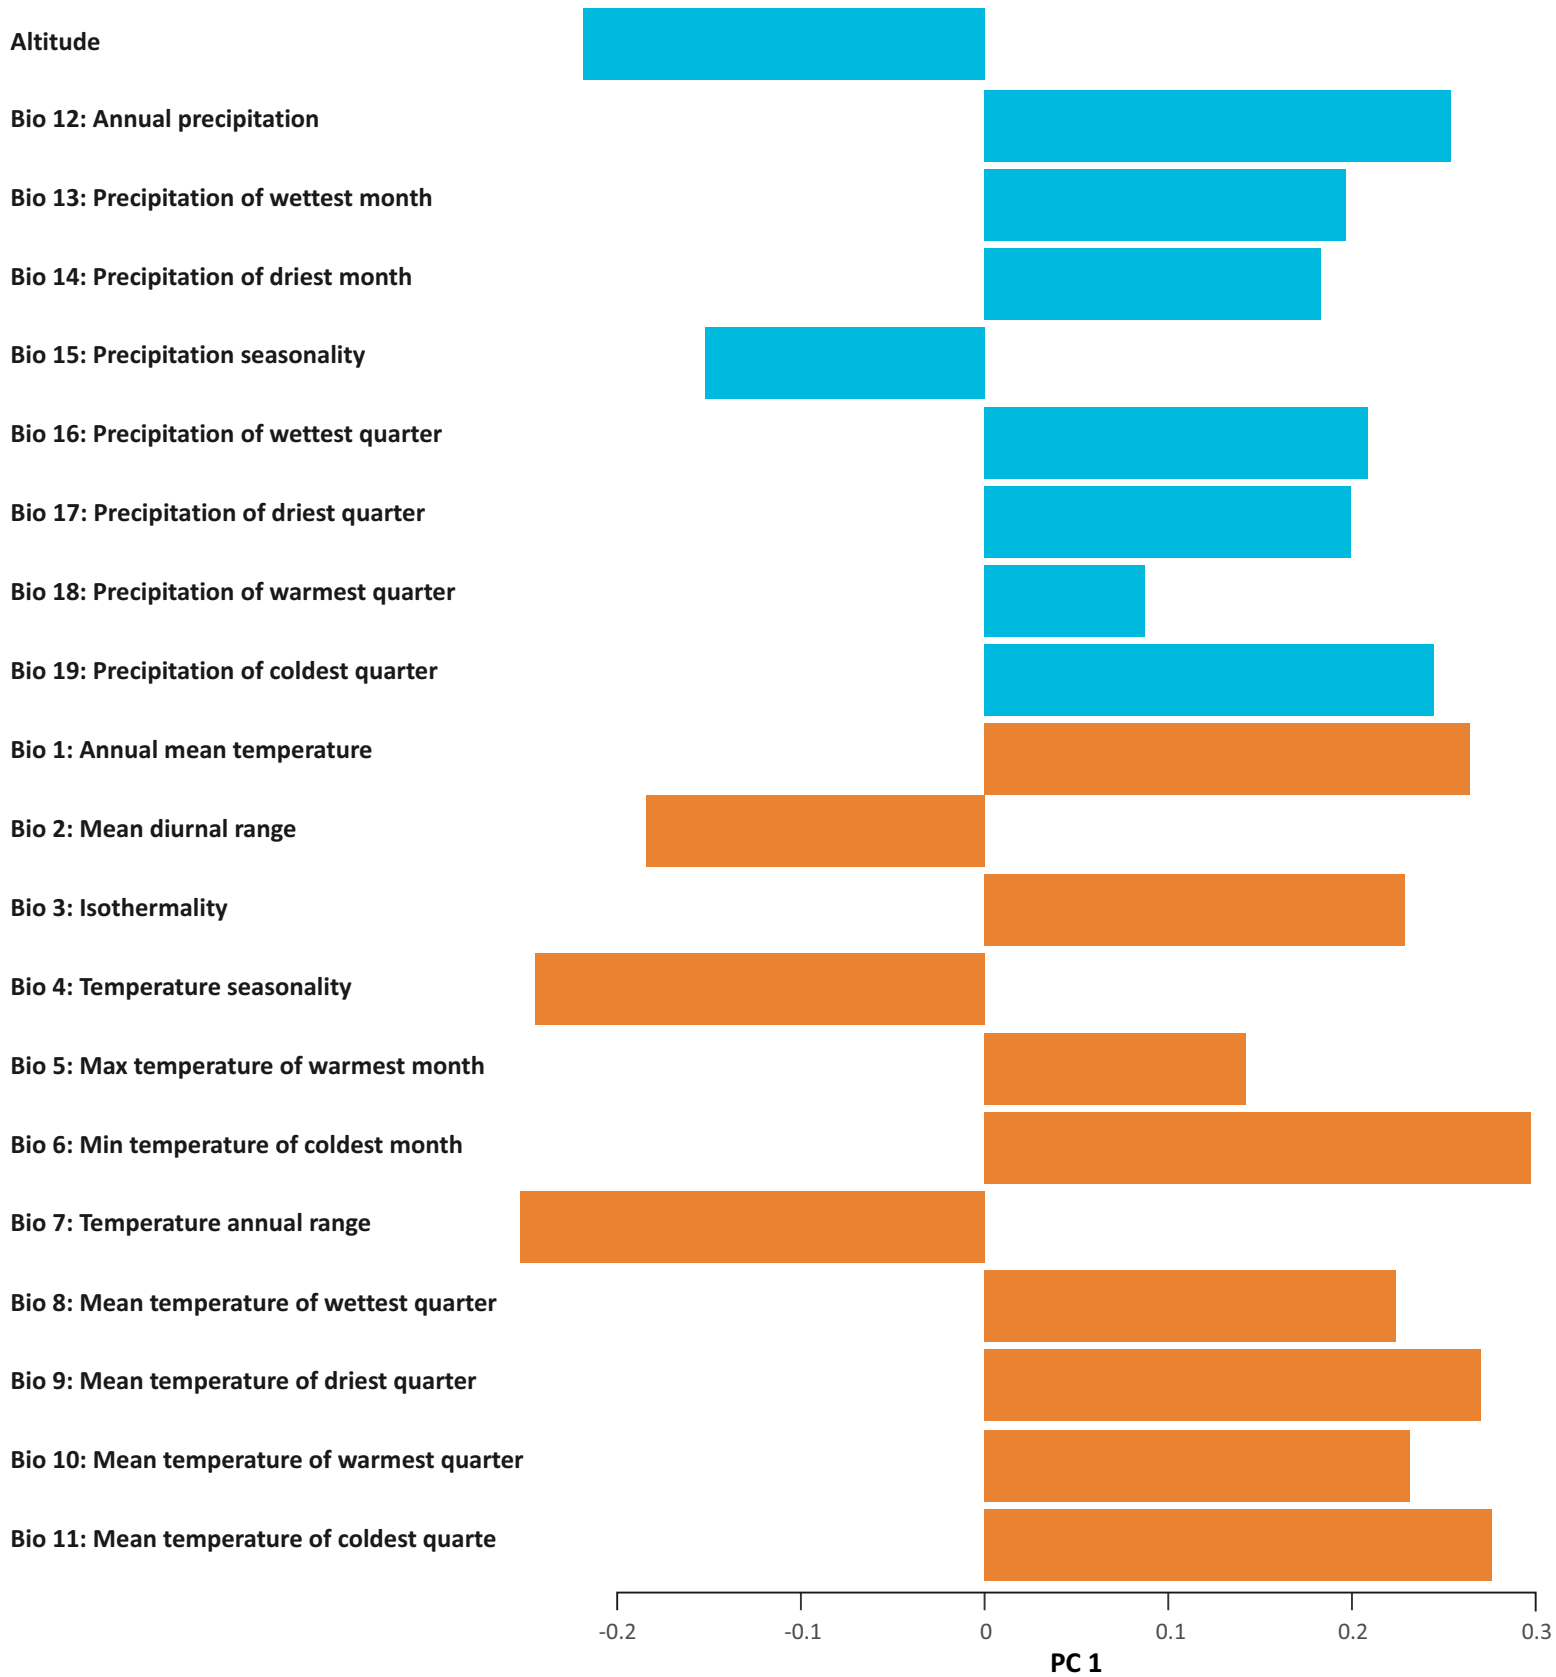

**Figure S8**

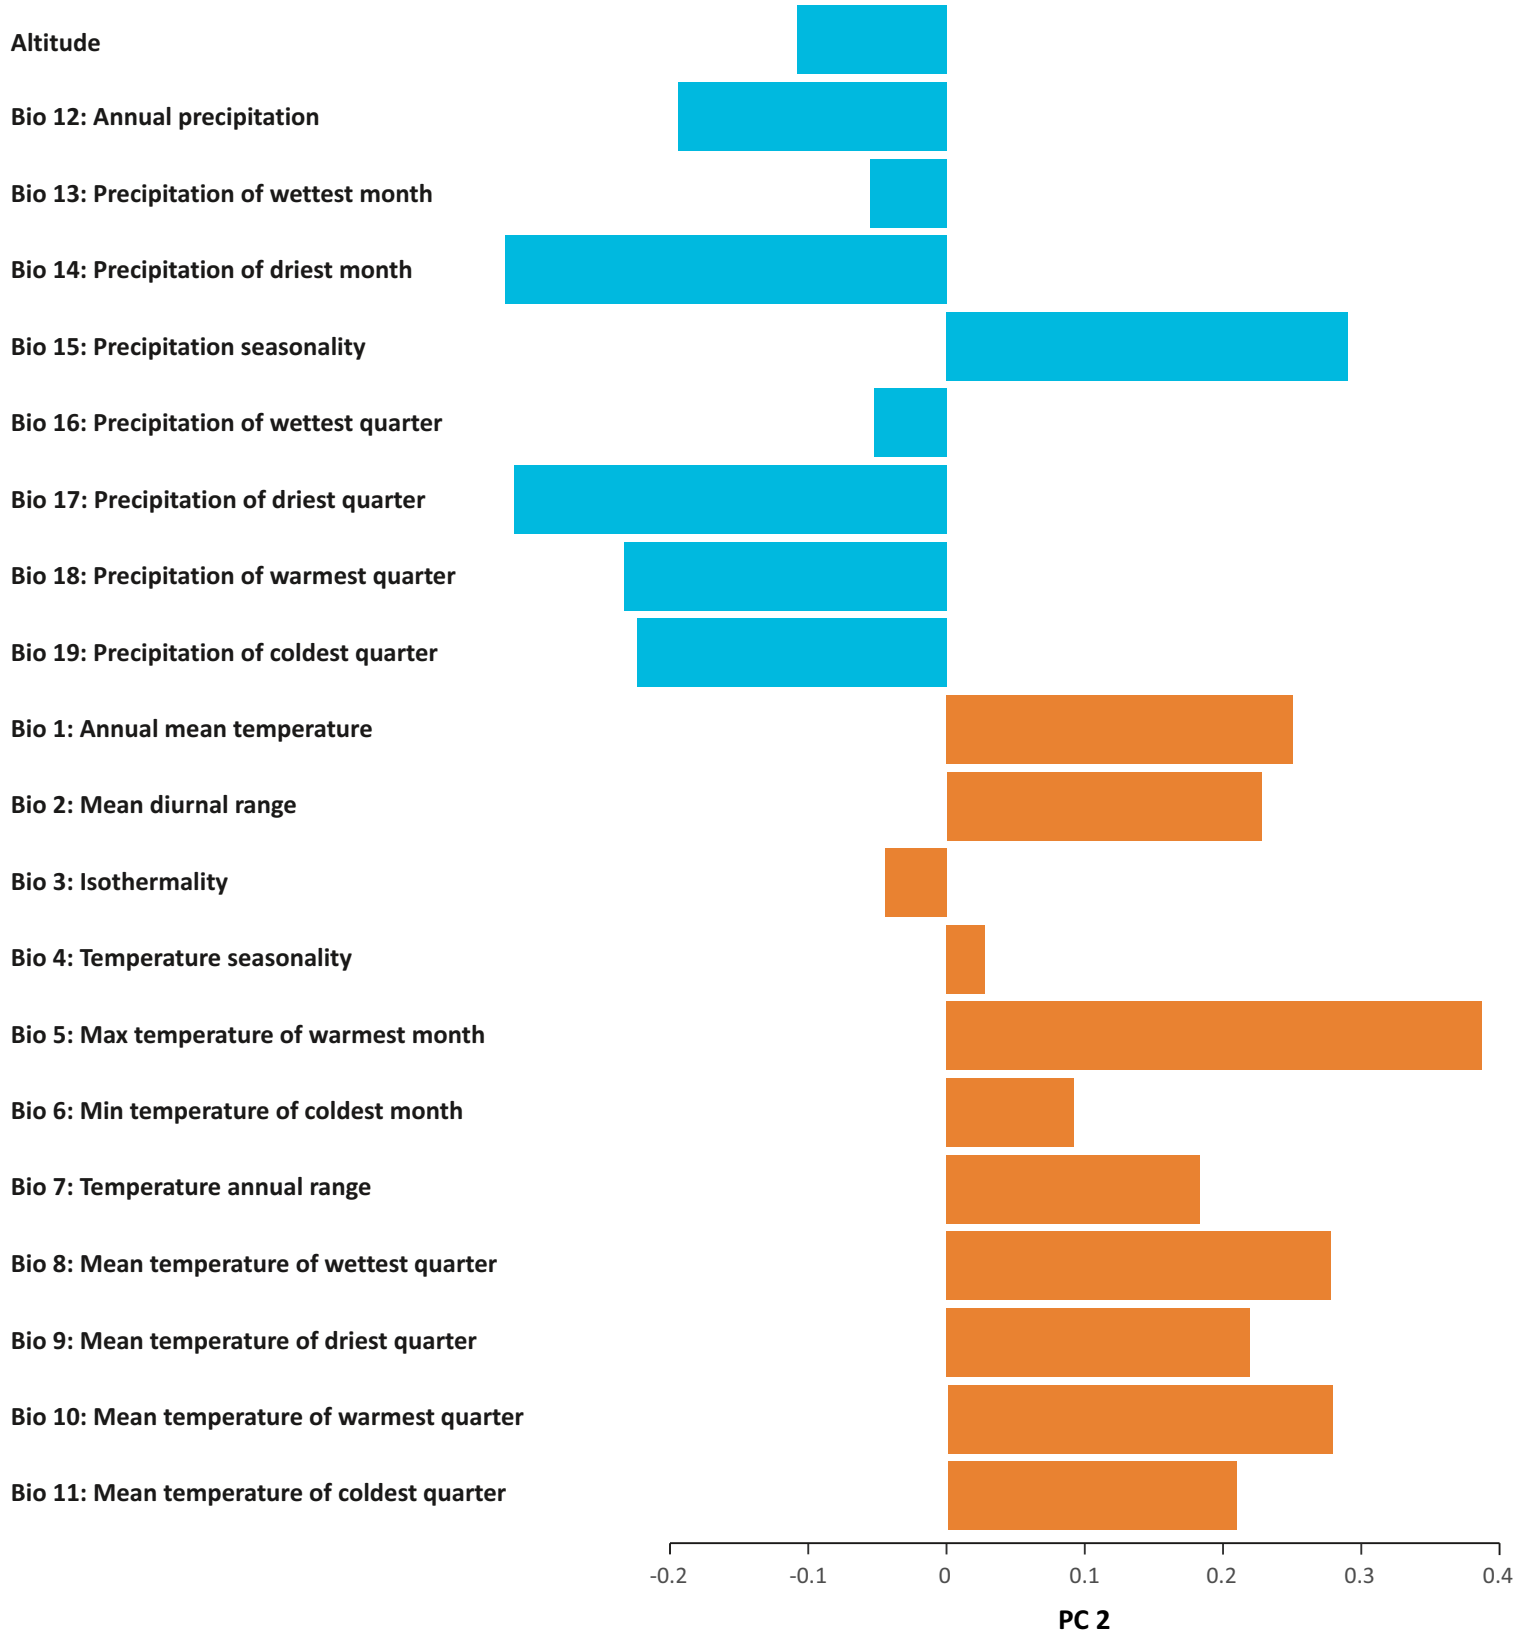

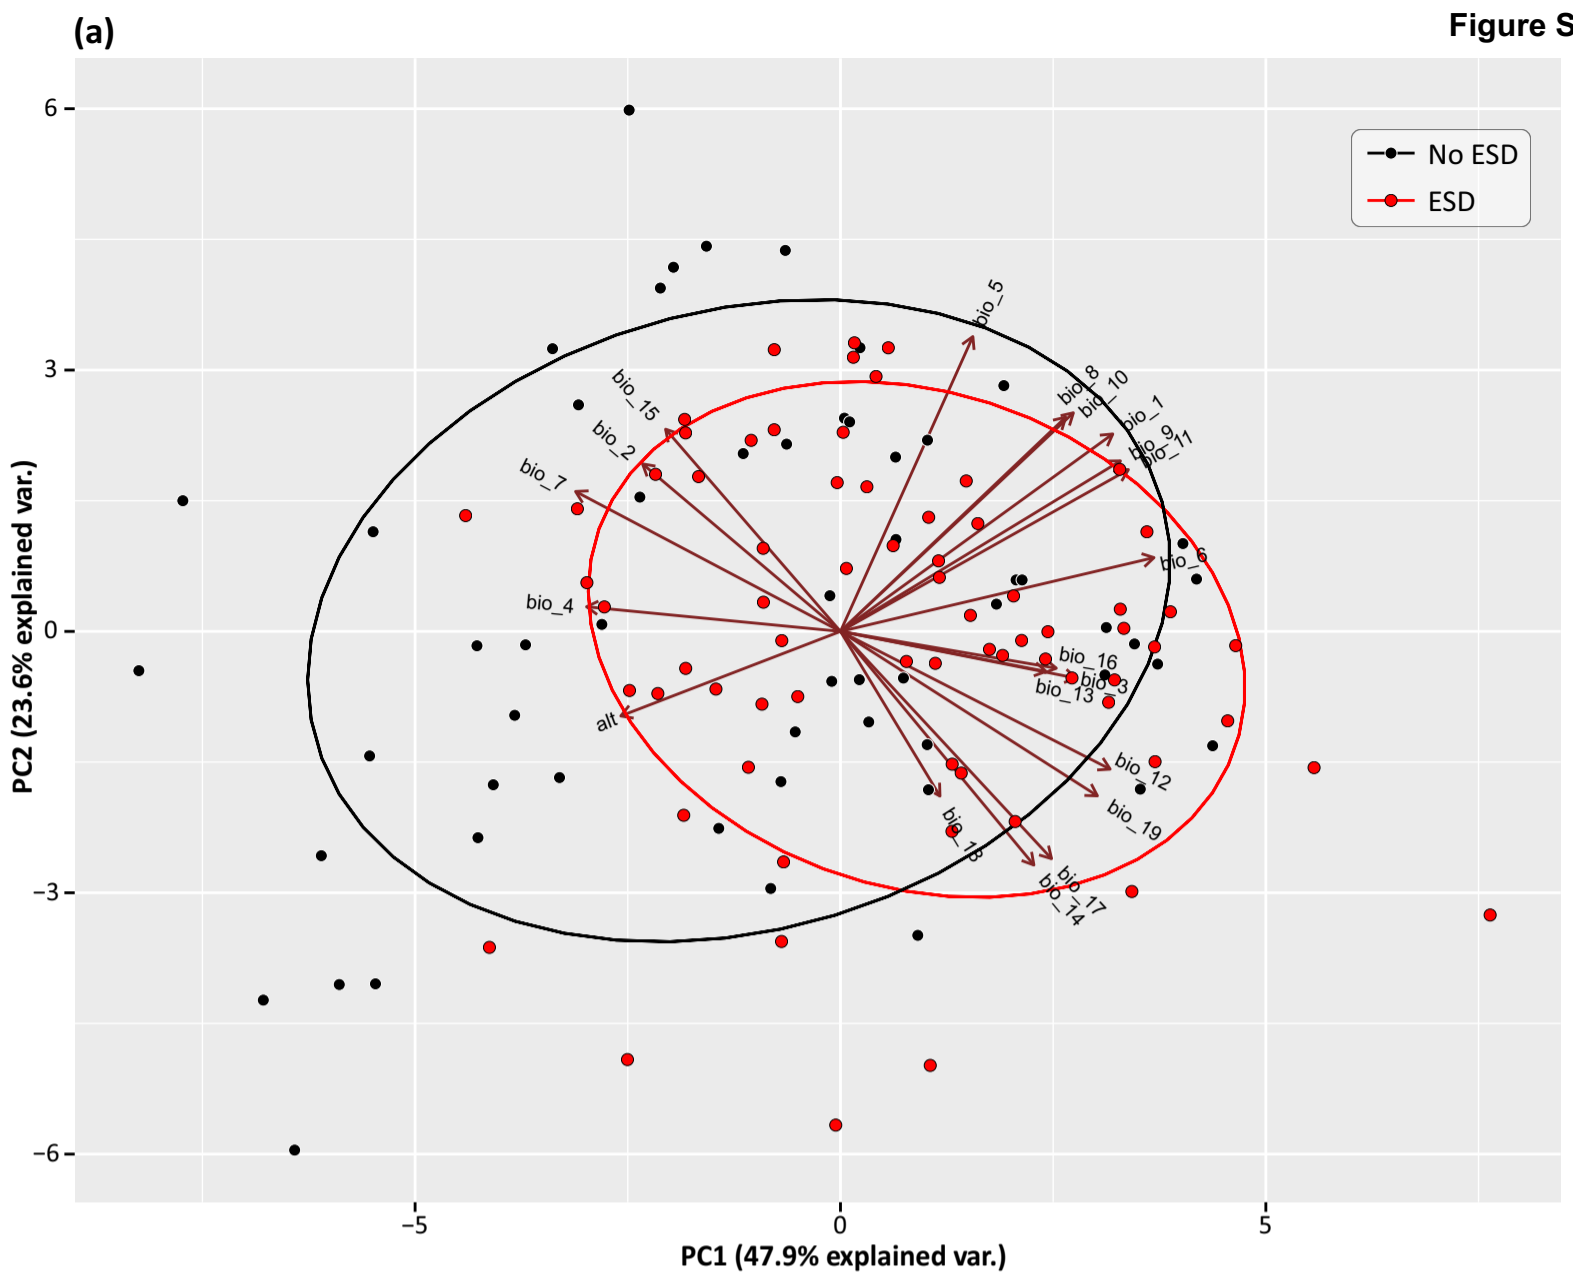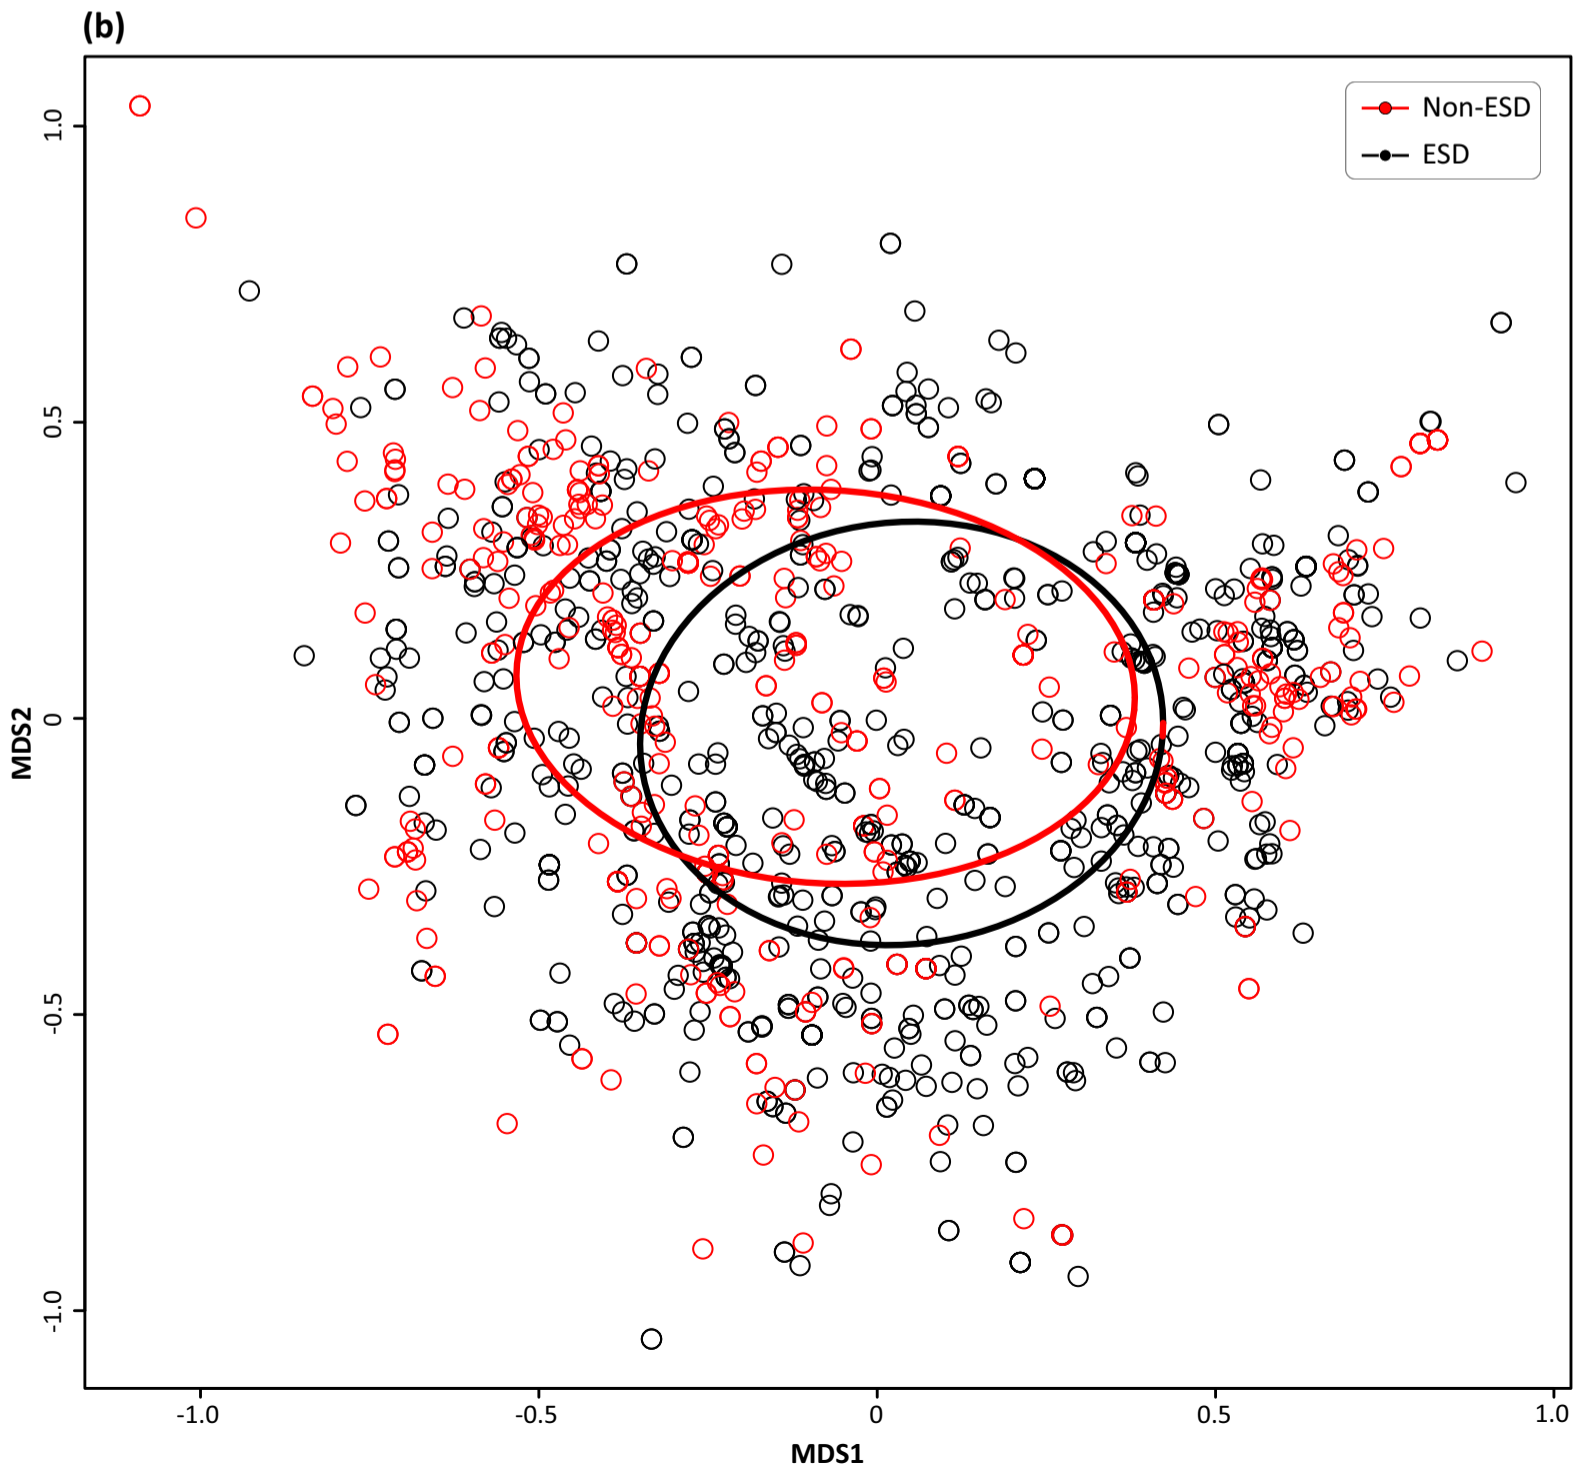



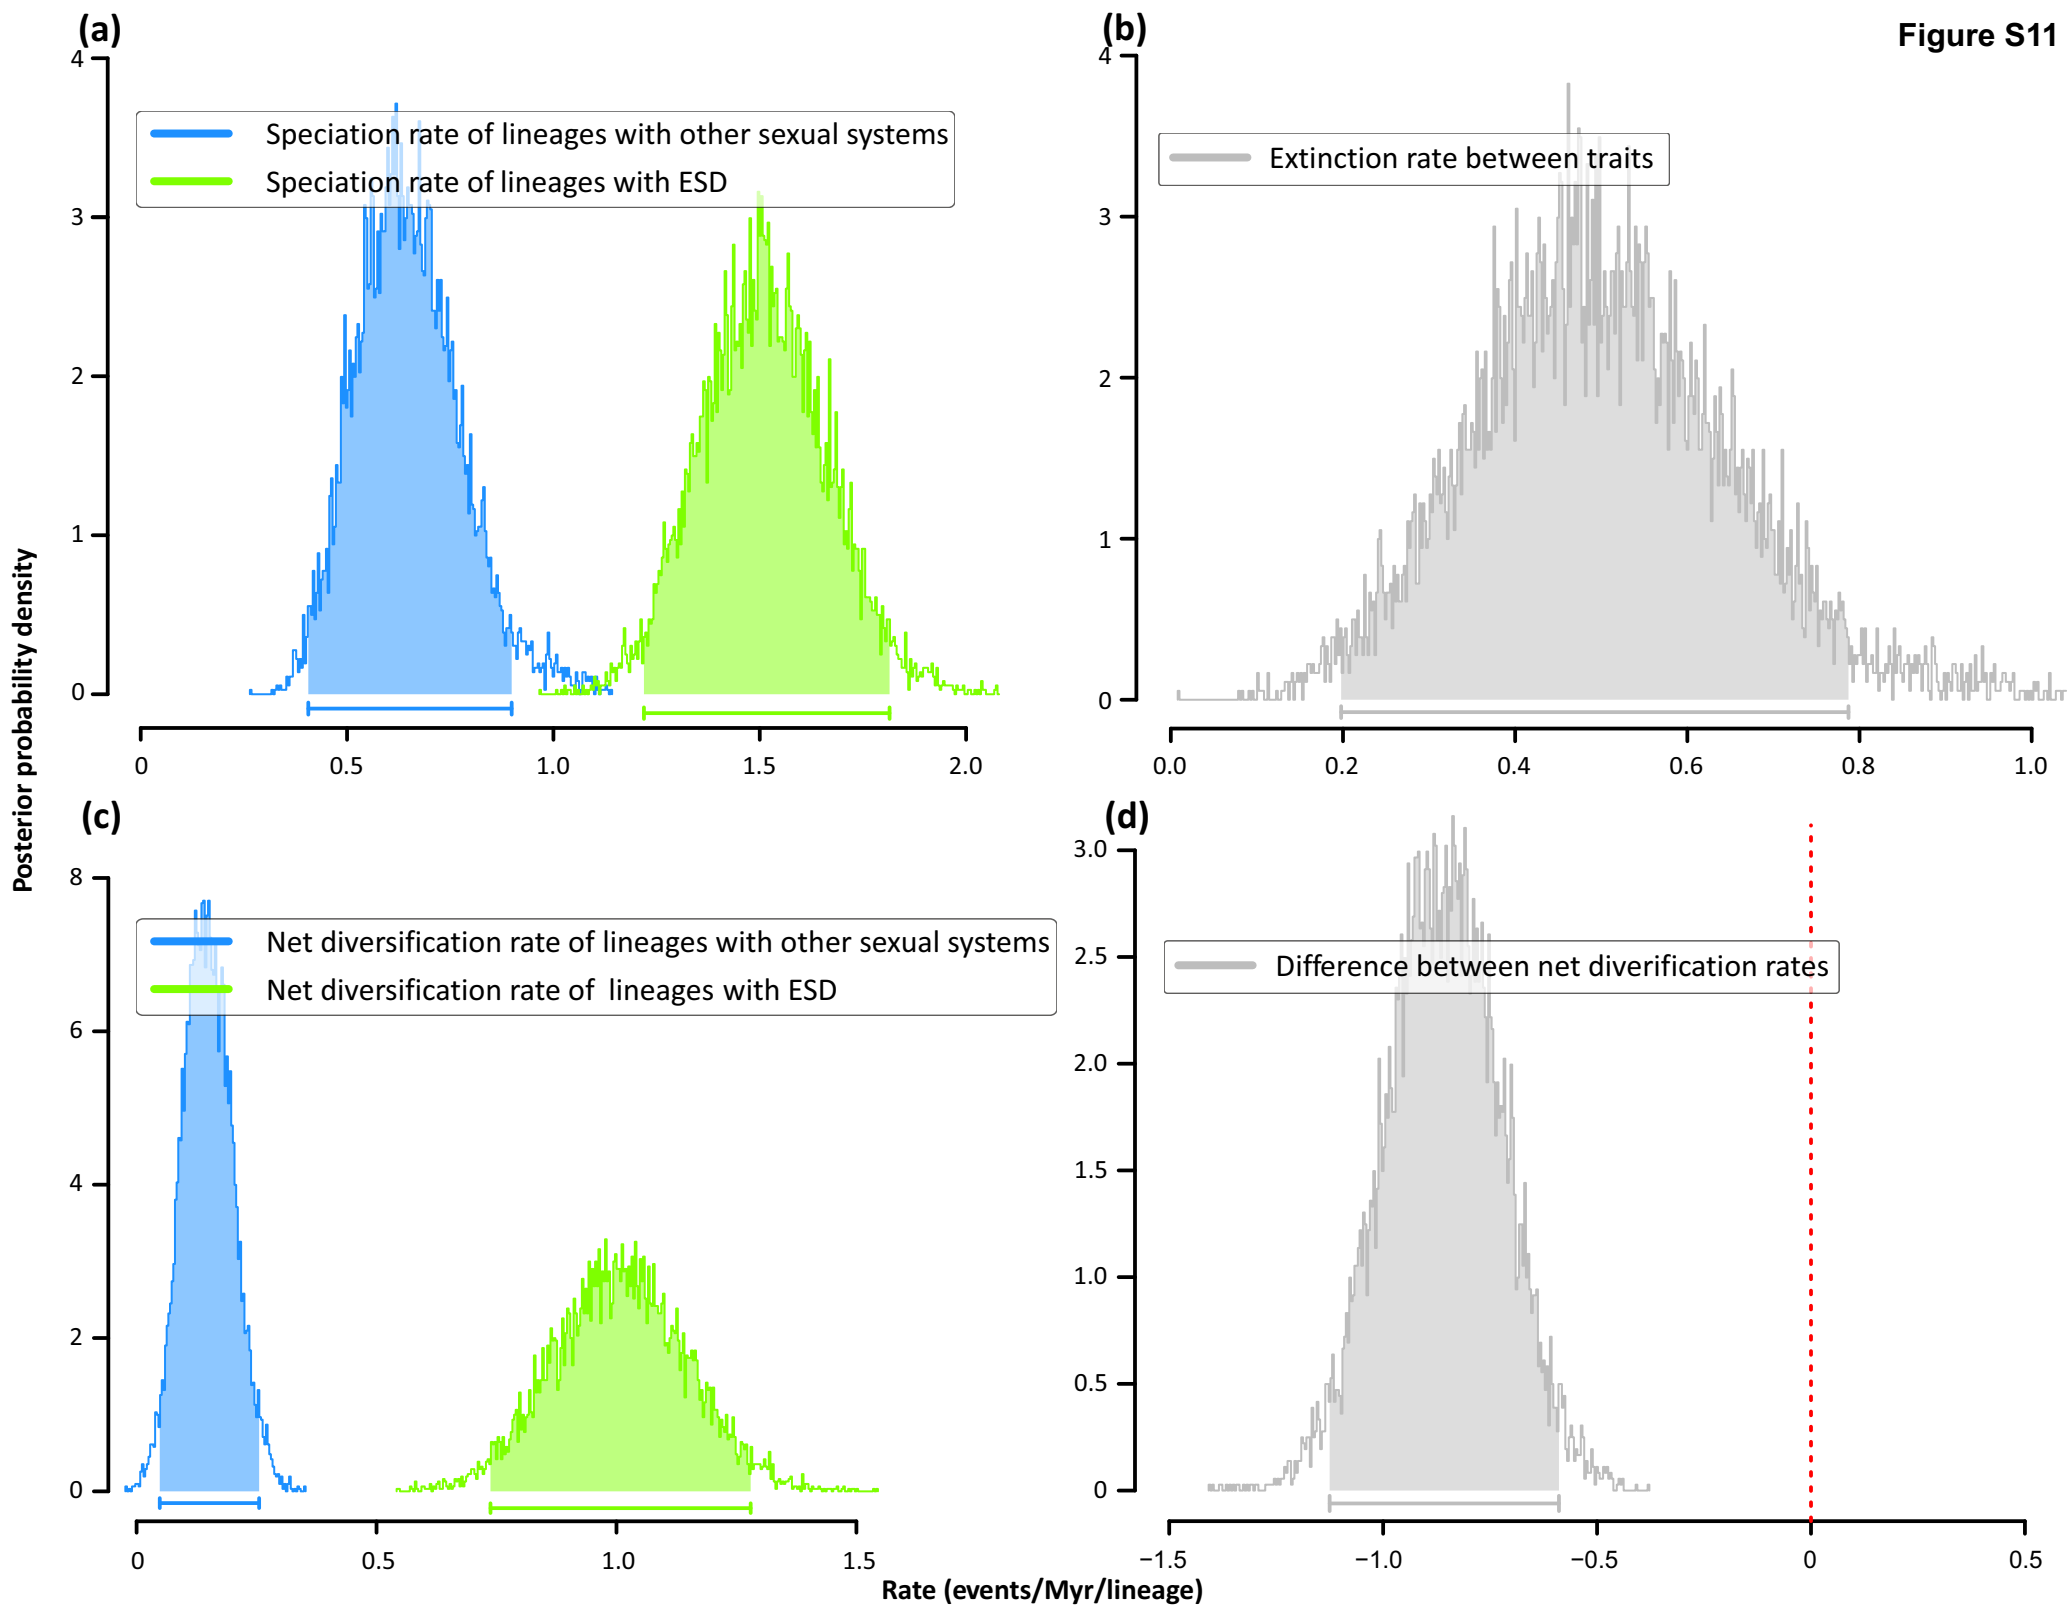

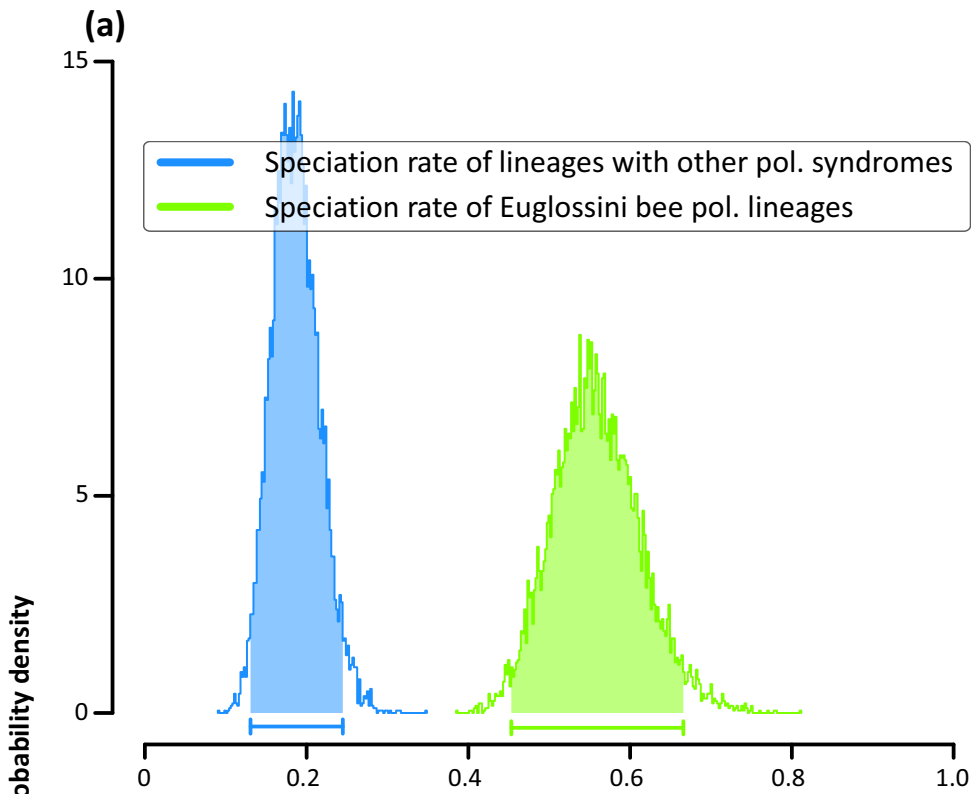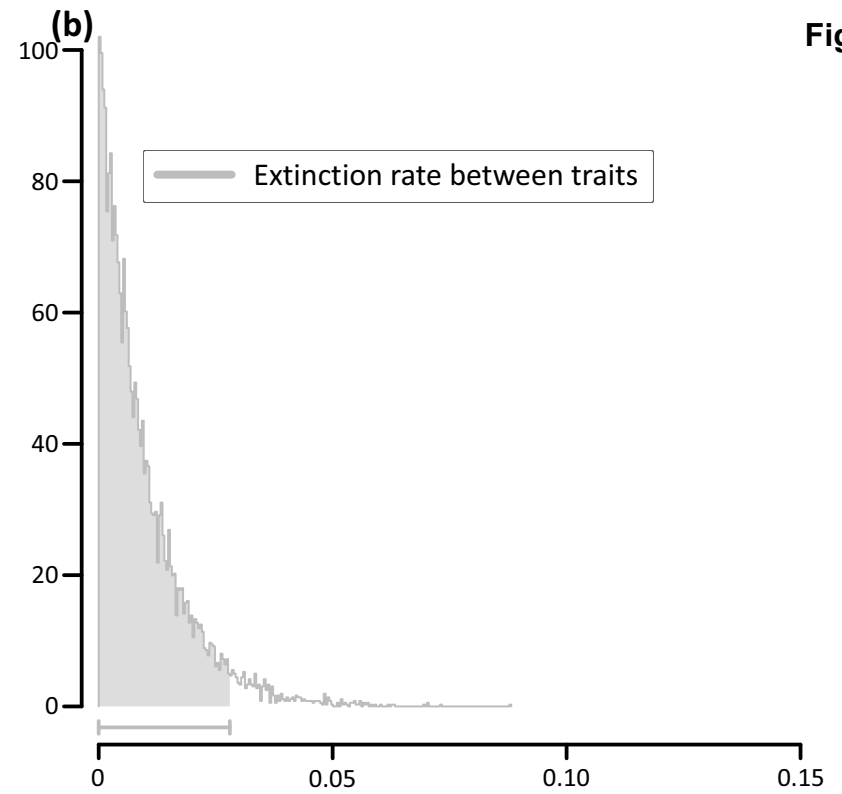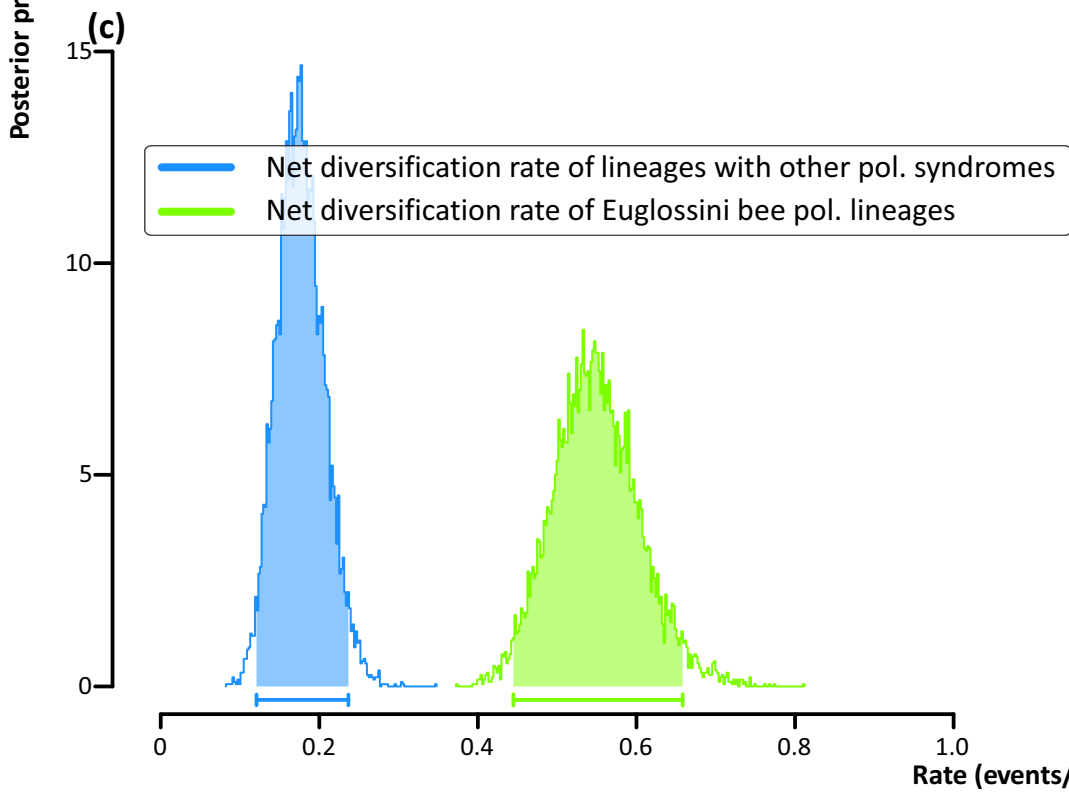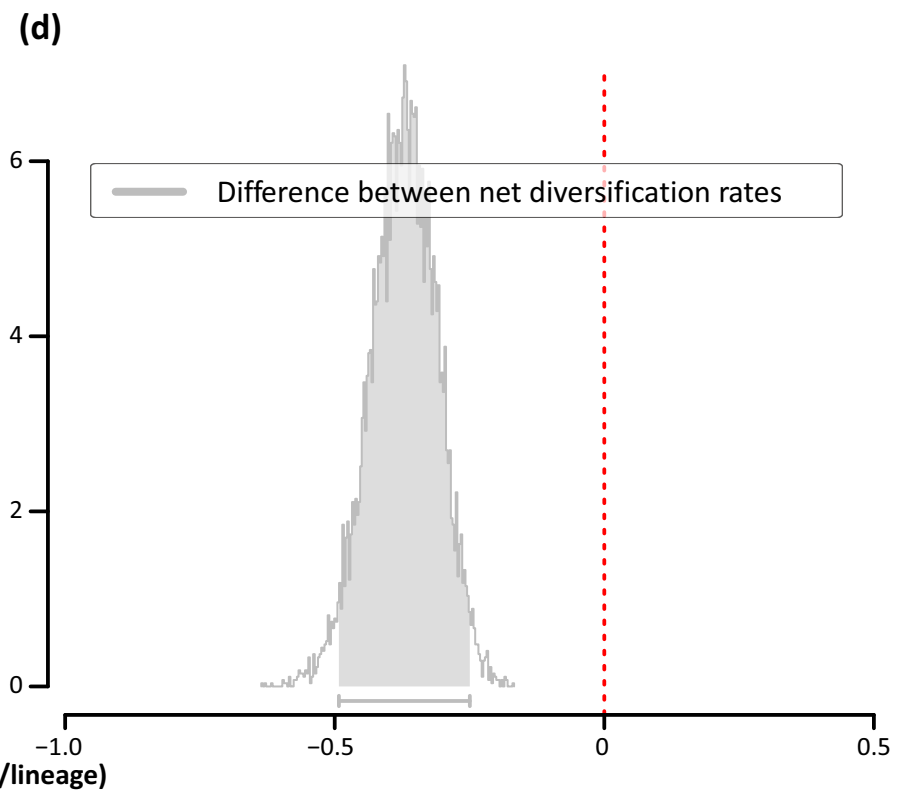

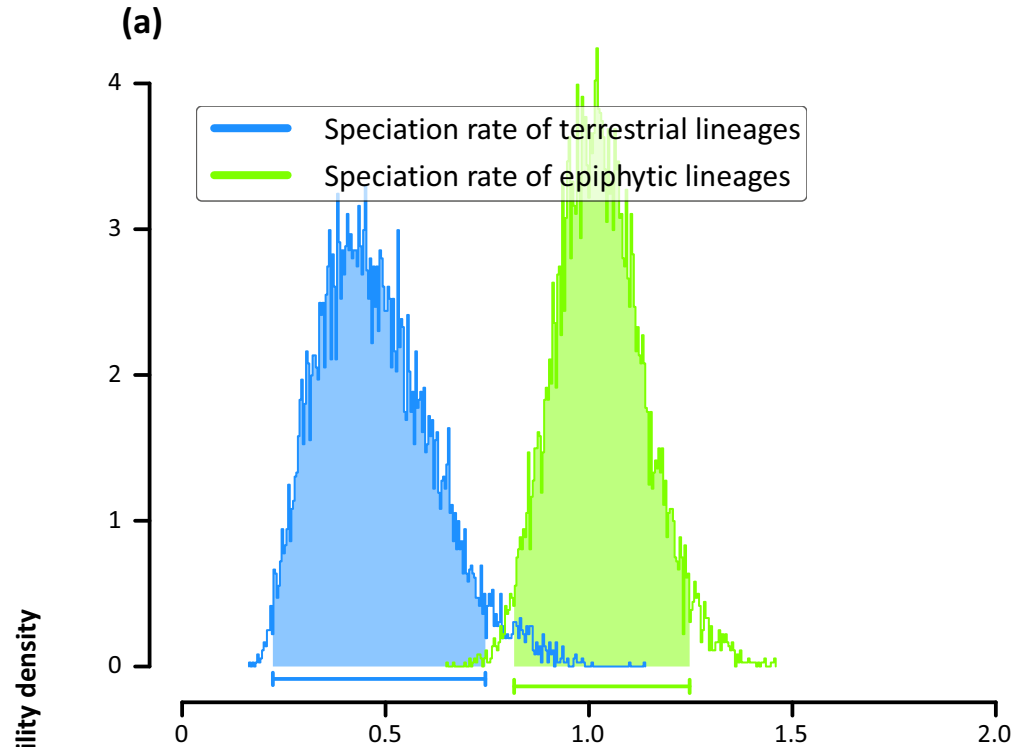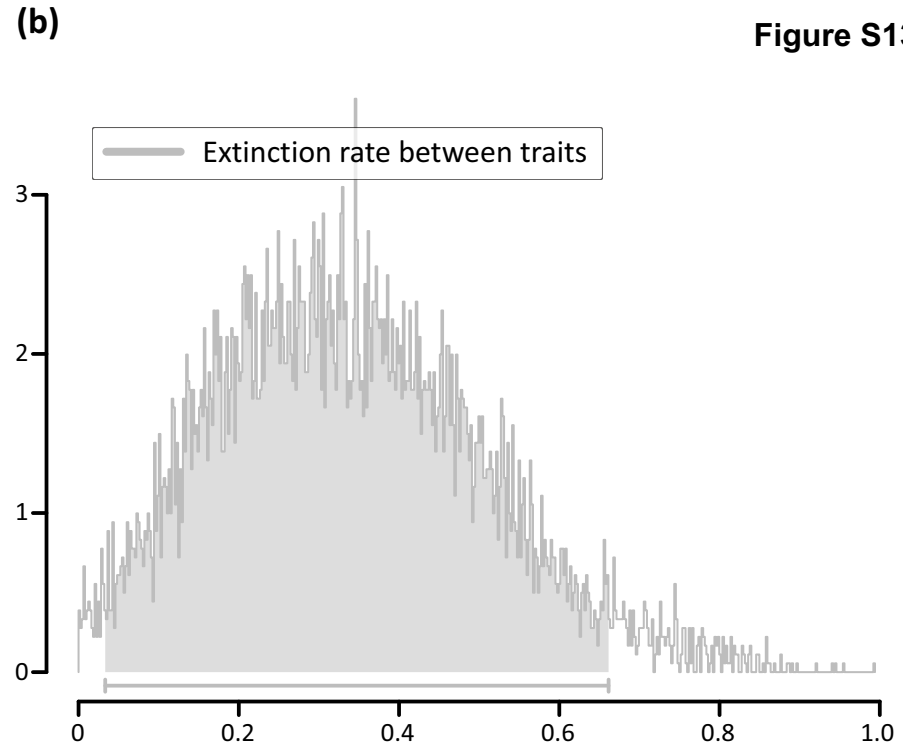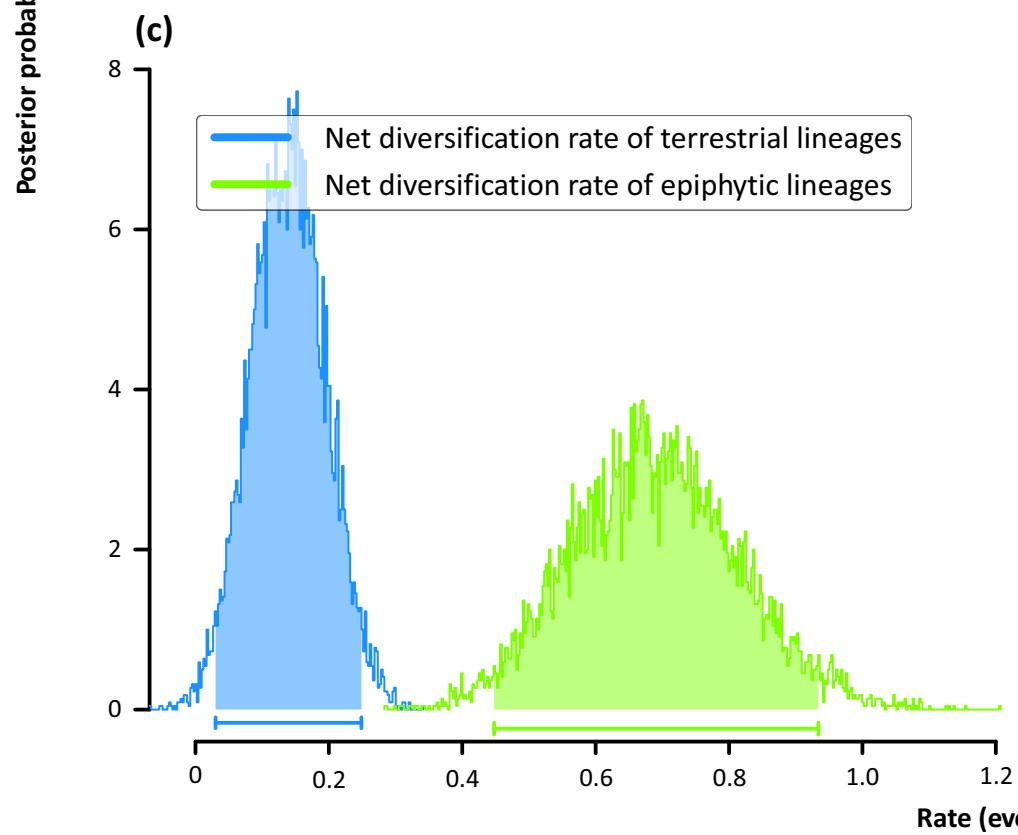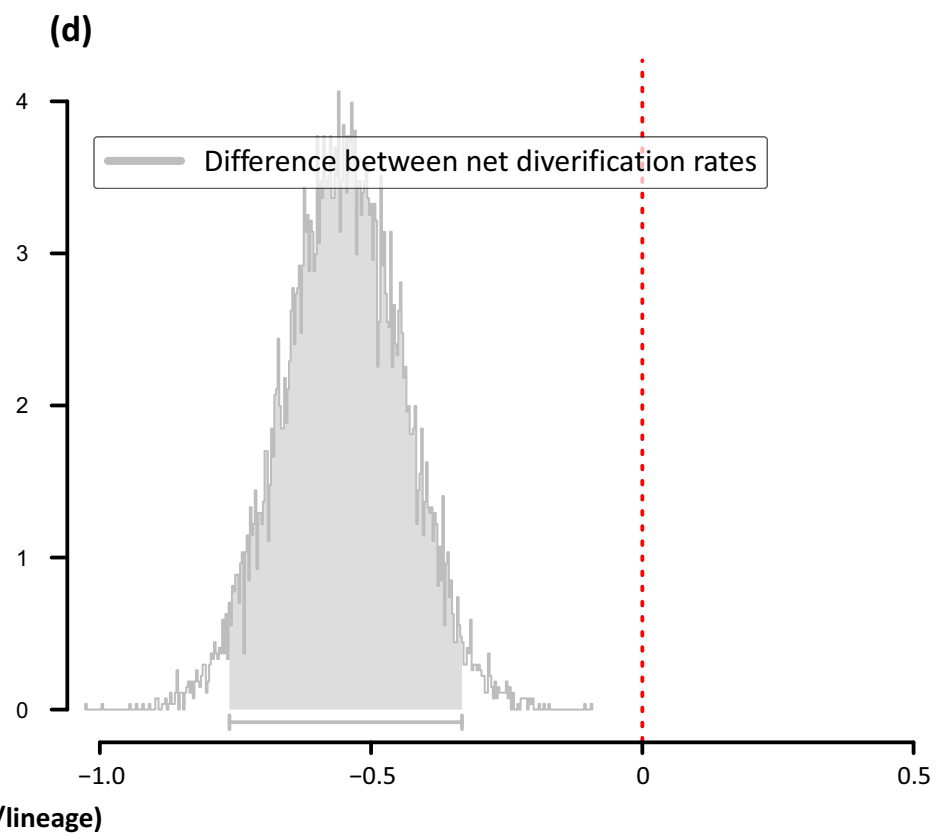



Figure S14

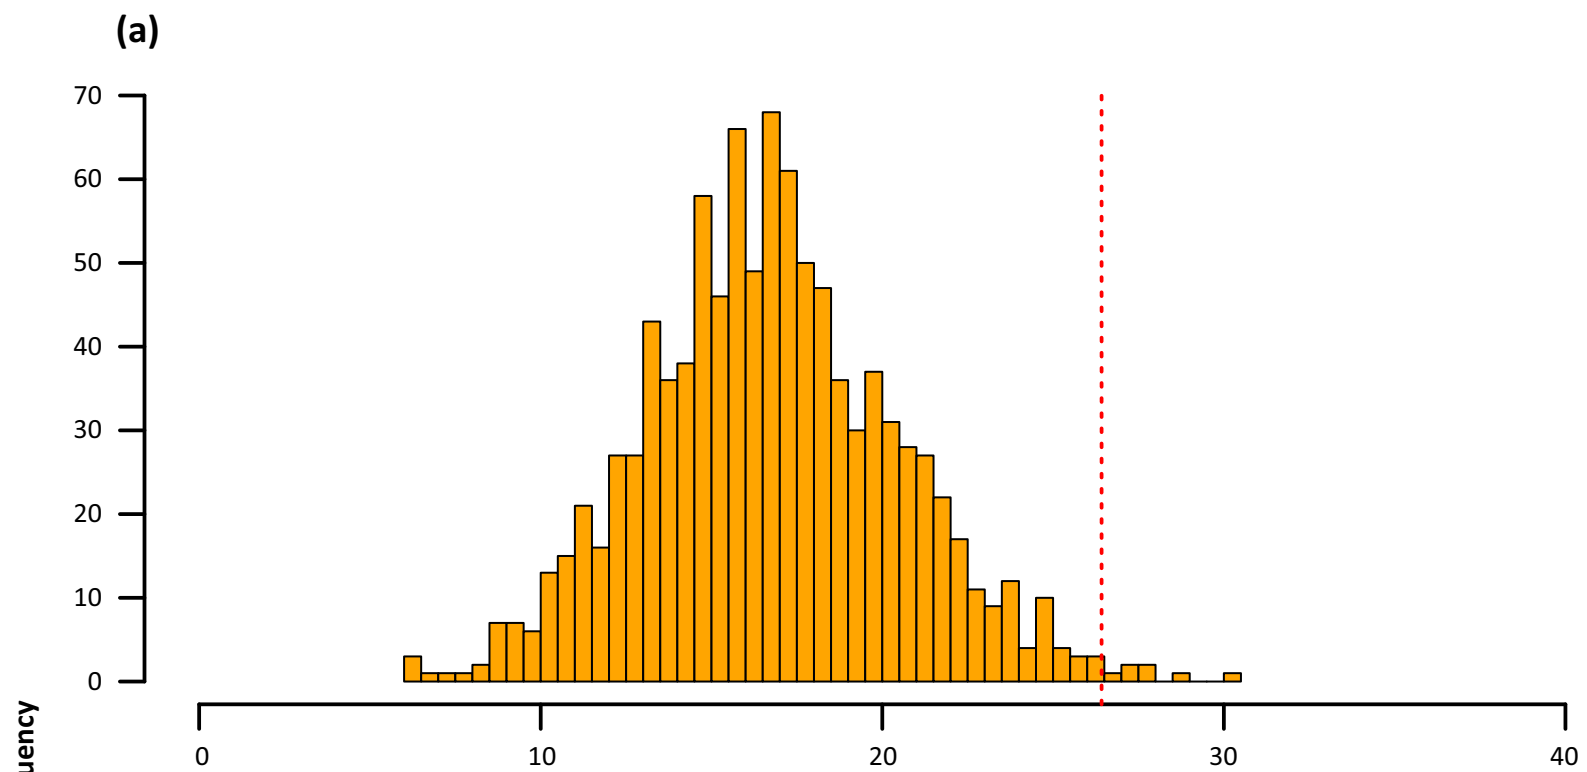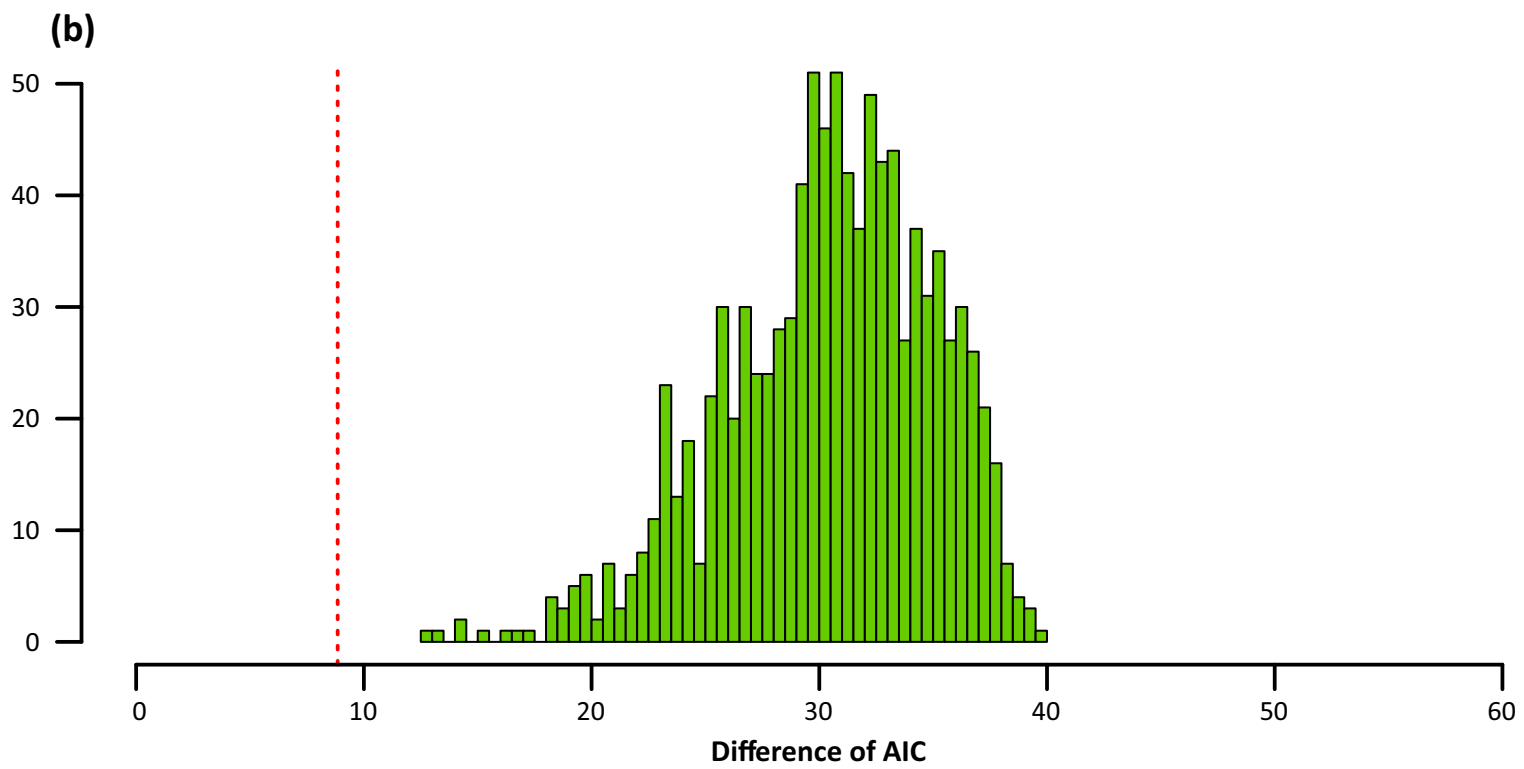

Supplement: 41598_2017_12300_MOESM1_ESM.pdf [file 41598_2017_12300_MOESM1_ESM.pdf]
